# 1 **Distinct gut metagenomics and metaproteomics signatures in** 2 **prediabetics and treatment-naïve type 2 diabetics**

3 Huanzi Zhong <sup>1,2,3,†</sup>, Huahui Ren <sup>1,2,3,†</sup>, Yan Lu <sup>4,†</sup>, Chao Fang <sup>1,2,3</sup>, Guixue Hou <sup>1,2</sup>,  
4 Ziyi Yang <sup>1,2</sup>, Bing Chen <sup>1,2</sup>, Fangming Yang <sup>1,5</sup>, Yue Zhao <sup>1,2</sup>, Zhun Shi <sup>1,2</sup>, Baojin  
5 Zhou <sup>1,2</sup>, Jiegen Wu <sup>1</sup>, Hua Zou <sup>1,5</sup>, Jin Zi <sup>1,2</sup>, Jiayu Chen <sup>2</sup>, Xiao Bao <sup>2</sup>, Yihe Hu <sup>4</sup>,  
6 Yan Gao <sup>4</sup>, Jun Zhang <sup>4</sup>, Xun Xu <sup>1,2</sup>, Yong Hou <sup>1,2</sup>, Huanming Yang <sup>1,6</sup>, Jian Wang <sup>1,6</sup>,  
7 Siqi Liu <sup>1,2</sup>, Huijue Jia <sup>1,2</sup>, Lise Madsen <sup>1,3,8</sup>, Susanne Brix <sup>9</sup>, Fang Liu <sup>4\*</sup>, Karsten  
8 Kristiansen <sup>1,2,3\*</sup>, Junhua Li <sup>1,2,7\*</sup>

9 1. BGI-Shenzhen, Shenzhen 518083, China.

10 2. China National GeneBank, Shenzhen 518120, China.

11 3. Laboratory of Genomics and Molecular Biomedicine, Department of Biology,  
12 University of Copenhagen, 2100 Copenhagen, Denmark.

13 4. Suzhou Centre for Disease Control and Prevention, Suzhou 215007, China

14 5. BGI Education Centre, University of Chinese Academy of Sciences

15 6. James D. Watson Institute of Genome Sciences, Hangzhou 310058, China.

16 7. School of Biology and Biological  
17 Engineering, South China University of Technology, Guangzhou 510006, China.

18 8. Institute of Marine Research, P.O. Box 7800, 5020 Bergen, Norway.

19 9. Department of Biotechnology and Biomedicine, Technical University of  
20 Denmark, Soltofts Plads, 2800 Kgs. Lyngby, Denmark.

21 \* Correspondence should be addressed to Junhua Li, [lijunhua@genomics.cn](mailto:lijunhua@genomics.cn); Karsten  
22 Kristiansen, ([kk@bio.ku.dk](mailto:kk@bio.ku.dk)), or Fang Liu ([13306135766@163.com](mailto:13306135766@163.com))

23 † Equal contributor

24

25

26

27

28 **Abstract (254 words)**

29 **Background**

30 The gut microbiota plays important roles in modulating host metabolism. Previous  
31 studies have demonstrated differences in the gut microbiome of T2D and prediabetic  
32 individuals compared to healthy individuals, with distinct disease-related microbial  
33 profiles being reported in groups of different age and ethnicity. However,  
34 confounding factors such as anti-diabetic medication hamper identification of the gut  
35 microbial changes in disease development.

36 **Method**

37 We used a combination of in-depth metagenomics and metaproteomics analyses of  
38 faecal samples from treatment-naïve type 2 diabetic (TN-T2D, n=77), pre-diabetic  
39 (Pre-DM, n=80), and normal glucose tolerant (NGT, n=97) individuals to investigate  
40 compositional and functional changes of the gut microbiota and the faecal content of  
41 microbial and host proteins in Pre-DM and treatment-naïve T2D individuals to  
42 elucidate possible host-microbial interplays characterising different disease stages.

43 **Findings**

44 We observed distinct differences characterizing the gut microbiota of these three  
45 groups and validated several key features in an independent TN-T2D cohort. We also  
46 demonstrated that the content of several human antimicrobial peptides and pancreatic  
47 enzymes differed in faecal samples between three groups, such as reduced faecal level  
48 of antimicrobial peptides and pancreatic enzymes in TN-T2D.

49 **Interpretation**

50 Our findings suggest a complex, disease stage-dependent interplay between the gut  
51 microbiota and the host and emphasize the value of metaproteomics to gain further  
52 insight into interplays between the gut microbiota and the host.

53

54 **Funding**

55 National Key Research and Development Program of China, No. 2017YFC0909703,  
56 Shenzhen Municipal Government of China, No. JCYJ20170817145809215, and  
57 National Natural Science Foundation of China, No. 31601073.

58 **Keywords**

59 Metagenomics, metaproteomics, prediabetes, treatment-naïve type 2 diabetes

60

61 **Introduction (6,070 words for the main text)**

62 Type 2 diabetes mellitus (T2D) is a chronic heterogeneous disorder associated  
63 with hyperglycaemia and low grade inflammation [1,2]. The prevalence has increased  
64 dramatically in Westernized countries, and also in China, where 11.6% and 36% of  
65 Chinese adults suffer from diabetes and prediabetes (Pre-DM), respectively [3]. Due  
66 to complications and comorbidities related to the development of T2D,  
67 comprehensive characterization of phenotypic, metabolic and molecular changes of  
68 the host and the gut microbiota in pre-DM and T2D compared to NGT is needed to  
69 enable early identification of prediabetic individuals at high risk of T2D development.  
70 Cross-sectional metagenomic studies have linked alterations in the gut microbiome to  
71 T2D and prediabetes [4–7]. However, a few recent intervention studies have reported  
72 profound impact of antidiabetic drugs on the human gut microbiome, such as  
73 metformin, acarbose and glucagon-like peptide-1 (GLP-1) based therapies [8–13],  
74 emphasizing the importance of controlling for medication in studies on association  
75 between the microbiota and T2D. Moreover, distinct disease-related microbial profiles  
76 have been reported in different age and ethnic groups [4–7], making it difficult to  
77 identify the microbes possibly involved in disease development. Thus, detailed  
78 information on the gut microbial species associated with T2D onset and progression is  
79 still limited. Whereas information from metagenomics is limited to identification of  
80 the presence of genes, taxa, and their inferred functional capacity, introduction of  
81 additional omics approaches including metabolomics, metatranscriptomics, and  
82 metaproteomics have increased our knowledge of microbial activity in health and  
83 disease [14–17]. For instance, recent metatranscriptomics studies on inflammatory  
84 bowel disease and cirrhosis cohorts have revealed considerable discrepancies between  
85 data obtained from metagenomics vs metatranscriptomics analyses [17,18]. As  
86 metaproteomics enables identification of microbial and human proteins  
87 simultaneously in faecal samples [14,19,20], such an approach offers a potential for  
88 deciphering both active microbial functions and host-microbiota interactions.

89

90 In the present study, we examined 254 stool samples collected from a Chinese cohort  
91 combining shotgun metagenomics and metaproteomics analyses. We characterized  
92 substantial differences between NGT, Pre-DM and TN-T2D individuals. Of note,  
93 consistent aberrations in Pre-DM and TN-T2D individuals included lower abundances  
94 of *Clostridiales* species and higher abundances of *Megasphaera elsdenii* compared to  
95 NGT individuals. Several robust microbial compositional changes were detected at  
96 both the DNA and protein levels, such as an enrichment of *E. coli* in Pre-DM  
97 individuals and an increased abundance of *Bacteroides spp.* in TN-T2D patients.  
98 Several Pre-DM-specific features were furthermore uncovered, including a reduced  
99 capacity for processes involved in energy metabolism and bacterial growth, and an  
100 enrichment of *Prevotella* proteins as detected by metaproteomics. Thus, our findings  
101 revealed distinct characteristics of the intestinal ecosystem in the Pre-DM stage. Of  
102 note, proteomics analyses of the faecal samples revealed that the levels of a number of  
103 human proteins including several antimicrobial peptides (AMPs) differed in faecal  
104 samples from NGT, Pre-DM, and TN-T2D individuals, suggesting that specific  
105 differences in the host response amongst groups might also influence the composition  
106 of the gut microbiota, or vice versa. In conclusion, our study provides a basis for  
107 further analyses integrating faecal metagenomics and metaproteomics which may lead  
108 to a better understanding of mechanisms underlying the development of Pre-DM and  
109 T2D.

110

## 111 **Materials and Methods**

### 112 **Suzhou T2D study population**

113 The study population recruited from community residents from Suzhou, comprised 97  
114 Chinese adults with normal glucose tolerance (NGT), 80 prediabetes patients  
115 (Pre-DM) and 77 newly diagnosed, treatment naïve type 2 diabetes patients (TN-T2D).  
116 All TN-T2D patients and Pre-DM individuals were screened and newly diagnosed  
117 according to the 2011 WHO criteria via well-trained staffs from the Suzhou Centre for  
118 Disease Prevention and Control (CDC), as described in detail in a recent published

119 lipidomic study based on this cohort [21]. All enrolled 254 individuals have reported  
120 with no anti-diabetic treatments; thus, none have had taken insulin, or any oral or  
121 injectable anti-diabetic medication before. Stool samples for metagenomics were  
122 self-collected in 2ml faecal containers and immediately stored at -80°C and  
123 transported to the laboratory on dry ice. DNA was extracted as previously described  
124 [4]. A summary of sample information is presented in **Table S1**. In addition, shotgun  
125 metagenomic datasets of stools from 94 anti-diabetic medication TN-T2D patients  
126 from Shanghai [9], a city near to Suzhou, were used for validation purpose.

127

## 128 **Method for Metagenomics**

### 129 **1. Generation of BGISEQ-500 based faecal metagenome data set**

130 In this study, we performed DNA library construction and the combinatorial  
131 probe-anchor synthesis (cPAS)-based BGISEQ-500 sequencing for metagenomics  
132 (single-end; read length of 100bp) and applied the same quality control workflow to  
133 filter the low-quality reads in accordance with the recently published metagenomic  
134 study using this new platform [22]. The remaining high-quality reads were then  
135 aligned to hg19 to remove human reads [23]. Metagenomic data statistics is provided  
136 in **Table S2**.

137

### 138 **2. Profiling of metagenomic samples and biodiversity analysis**

139 High-quality non-human reads were aligned to the 9.9M integrated gene catalogue  
140 (IGC) by SOAP2 using the criterion of identity  $\geq 90\%$  [23]. Sequence-based gene  
141 abundance profiling was performed as previously described. The relative abundances  
142 of phyla, genera, species and KOs were calculated by the sum of the relative  
143 abundance of their annotated genes. The alpha diversity (within-sample diversity) was  
144 quantified by the Shannon index using the relative abundance profiles at gene, genus  
145 and KO levels as described [23]. The beta diversity (between-sample diversity) was  
146 calculated using Bray-Curtis dissimilarity (R version 3.3.2, vegan package 2.4-4).

147

### 148 **3. Metagenome-wide association analysis (MWAS)**

149 MWAS was performed on the Suzhou T2D cohort as previously described [4]. Using  
150 non-parametric Kruskal-Wallis test (R version 3.3.2 stats package), we identified  
151 266,015 genes showing significant different abundances between the NGT, Pre-DM  
152 and TN-T2D groups ( $P < 0.05$ ). After clustering, a total of 126 MLGs ( $\geq 100$  genes)  
153 were generated from these genes. The relative abundance of each MLG was summed  
154 using the relative abundance values of all genes from this MLG. The taxonomic  
155 annotation of each MLG was determined if more than 50% of genes in this MLG  
156 could be assigned to a certain taxon according to their IGC annotation. The genes of  
157 85 unclassified MLGs were further annotated using a reference sequence database  
158 including 1520 high-quality genomes cultivated from healthy Chinese individuals  
159 [24], resulted in the taxonomic annotations of 11 additional MLGs (See detailed  
160 information in **Table S5**).

161

### 162 **Method for Metaproteomics**

#### 163 **1. Sample preparation and LC-MS/MS analysis**

164 Faecal samples from 84 individuals from NGT, Pre-DM, and TN-T2D individuals  
165 were used for metaproteome analysis using isobaric tags for relative and absolute  
166 quantitation (iTRAQ)-coupled-liquid chromatography tandem mass spectrometry  
167 (LC-MS/MS) (**Figure S1**). Each group consisted of 28 randomly selected individual  
168 samples with matched age, sex and BMI by propensity score matching (R version  
169 3.3.2, MatchIt package 2.4-21) [25] (**Table S3**). Faecal samples were processed using  
170 the filter-aided sample preparation (FASP) protocol [26]. Briefly, 100mg frozen faeces  
171 from each individual were suspended in 500 $\mu$ l lysis buffer (4% SDS, 100mM  
172 dithiothreitol, 100mM Tris-HCL (pH=7.8) with freshly added protease inhibitors  
173 (cOmplete™, EDTA-free Protease Inhibitor Cocktail, Roche Applied Science). The  
174 samples were incubated for 5 min at 100 °C, followed by sonication to decrease the  
175 viscosity. The protein supernatants were collected after centrifugation at 30,000g at  
176 4 °C for 30 min and then quantified using a 2D-quant kit (Sigma). For each diagnostic

177 group, protein extracts in equal amounts from four individuals were pooled, and the  
178 selected 28 samples were thus aliquoted into 7 mixtures. A reference sample was  
179 created by pooling equal amounts of protein from each of 84 individual sample and 28  
180 samples from self-reported T2D patients. Each mixture containing 100µg proteins  
181 was loaded onto a 10 kDa cut-off spin column (Vivacon 500, Sartorius AG,  
182 Goettingen, Germany). The lysate was adjusted to 8M urea by centrifuging to remove  
183 SDS and low-molecular-weight material. After reduction by dithiothreitol (DTT) and  
184 alkylation by iodoacetamide (IAM), 8M urea was added and centrifuged to remove  
185 any remaining reagent such as IAM. The urea buffer was then replaced with 0.5M  
186 triethylammonium bicarbonate (TEAB) and the sample was washed with 0.5M TEAB  
187 5 times. Trypsin (Promega, Madison, WI, USA) was added to digest the protein at a  
188 protein: trypsin ratio of 50:1 and the mixtures were incubated for 18 hours at 37 °C.  
189 The resulting peptides were eluted twice with 100µl 0.5M TEAB by centrifuging at  
190 12,000 g for 30 min and vacuum-dried. The peptide mixture samples were then  
191 dissolved in 0.5M TEAB and labelled with 8-plex iTRAQ reagents according to the  
192 manufacturer's protocol (AB Sciex, USA). For each diagnostic group, 7 mixtures  
193 were labelled with tags from I113 to I119. To perform the iTRAQ quantitation  
194 throughout the whole experiment, we labelled the reference sample by tag 121 in each  
195 iTRAQ run. Thus, three independent 8-plex iTRAQ runs were conducted.  
196 Subsequently, labelled peptides were separated on a LC-20AB HPLC system  
197 (Shimadzu, Kyoto, Japan) with an Ultremex SCX column (Phenomenon, Torrance,  
198 CA) and collected into 20 fractions. Each fraction was analysed via a NanoLC system  
199 coupled with a Q Exactive mass spectrometry (Thermo Fisher Scientific, San Jose,  
200 CA) as described previously [27].

201

## 202 **2. Database searching and protein identification**

203 For protein database searching, we used Mascot (Version 2.3) [28] as the search  
204 engine with the following parameters: trypsin was used as default enzyme and up to  
205 two missed cleavages were allowed. Carbamidomethyl (C), iTRAQ8plex (N-term)



206 and iTRAQ8plex (K) were chosen as fixed modifications, and Oxidation (M) was  
207 chosen as variable modification. The peptide mass tolerance was set to 10 ppm and  
208 the fragment mass tolerance to 0.03 Da.

209 A two-step search method was applied. The MS/MS spectra were first searched  
210 against a collection of three protein sequence databases, including *Homo sapiens*  
211 sequences retrieved from SwissProt (release 2014\_11), and human gut microbial  
212 protein sequences of IGC genes mapped by sequencing reads from our 254  
213 metagenomic samples. The detailed search parameters are presented in **Table S4**. The  
214 Mascot search yielded a set of scored peptide-spectrum matches (PSMs) and the  
215 proteins were inferred from the PSMs. Subsequently, a target-decoy protein database  
216 was created containing the above-mentioned proteins and the reversed sequences from  
217 these proteins. A second round search based on the target-decoy database was  
218 performed to control for false positives as described elsewhere [29]. The PSMs were  
219 re-scored by Mascot Percolator [30] integrated into IQuant [31], and filtered at false  
220 discovery rate (FDR)  $\leq 0.01$ . To improve the confidence in identification, peptides  
221 supported by  $\geq 2$  spectra were retained and protein identifications were thus inferred.

222

### 223 **3. Meta-protein Generation**

224 Due to the shared similarity of metagenomic protein reference sequences, a microbial  
225 peptide hit is typically returned from several proteins within and between species. To  
226 avoid inflating numbers and alleviate taxonomic ambiguities of identified microbial  
227 proteins, several processes were performed to reduce data redundancy. We first  
228 grouped the microbial proteins with at least one shared peptide to generate protein  
229 clusters (**Figure S2**). Each cluster was then processed according to the maximum  
230 parsimony principle. The minimum protein sets containing all peptides of each cluster  
231 were selected and defined as the meta-protein representing the cluster (**Figure S2**).  
232 Individual proteins which only contained unique peptides were also assigned as a  
233 meta-protein. All redundant non-meta-protein sequences were thus omitted in  
234 subsequent analyses.

235

#### 236 **4. Protein Quantification**

237 Protein quantification was performed by IQuant [31] in the following three steps.

238 We first normalized the intensities of iTRAQ reporter ions for all spectra across the  
239 eight iTRAQ-labelled samples (I113...I119, I121) using the formula (1) as follows:

240

$$241 \quad \overline{s_{i-k}} = \frac{S_{i-k}}{\text{median}(S_{1-k}:S_{n-k})}, \text{ where } k=I113...I119, I121 \quad (1)$$

242

243 Where  $\overline{s_{i-k}}$  is the normalized relative intensity of spectrum  $i$  in the label  $k$ .

244

245 The reporter ion ratios were then determined using the formula (2):

$$246 \quad \overline{r_{i-k}} = \frac{\overline{s_{i-k}}}{\overline{s_{i-121}}}, \text{ where } k = I113 \dots I119 \quad (2)$$

247 Where  $\overline{r_{i-k}}$  is the ratio of relative intensity of spectrum  $i$  in the label  $k$ , with  $S_{i-121}$ ,  
248 the relative intensity of the global QC labelled with 121 tags, as denominators.

249

250 For protein quantification, only unique peptides were taken into consideration. The  
251 relative protein ratio was calculated using the mean relative intensity ratio of all  
252 unique peptide spectra in each protein using the formula (3):

$$253 \quad \overline{p_k} = \text{mean}(\overline{r_{1-k}}: \overline{r_{p-k}}), \text{ where } k = I113 \dots I119 \quad (3)$$

254 Where  $\overline{p_k}$  is the protein ratio in label  $K$  and acts as an indication of the relative  
255 proportions of that protein between the differently labelled samples.

256

#### 257 **5. Protein annotation**

258 For microbial meta-proteins, taxonomic and functional annotations of identified  
259 proteins were derived from the putative protein-coding IGC genes. As a result, we  
260 linked 64.15% (8777 of 11,980) of the meta-proteins with annotation at the phylum or  
261 lower taxonomical levels and 80.27% (10983 of 11,980) with KEGG Ontology (KO)

262 annotation. For human proteins, functional annotations were obtained from  
263 UniProtKB/Swiss-Prot (release 2014\_11).

264

## 265 **Statistical analyses of metagenomes and metaproteomes**

### 266 **MLG-based random forest classification**

267 Relative abundance data of all MLGs were subjected to random forest (RF) analysis  
268 to perform five-fold cross validation (R 3.3.2, caret package 6.0-77) [32]. The  
269 combinations of optimal MLGs markers maximising the discrimination accuracy  
270 between each two groups were thus determined by RF using an embedded feature  
271 selection strategy as previously reported [33]. The importance values of  
272 model-selected MLGs were calculated using “mean decrease in accuracy” strategy.

273

### 274 **Spearman’s rank coefficient correlation**

275 Spearman’s rank coefficient correlation (SCC) analysis was used for correlations  
276 between MLG profiles and phenotypic factors, and between number of meta-proteins  
277 and metagenomic abundances at the genus level, and between the levels of proteins.  
278 The significance cut-off for SCC was set at an FDR adjusted  $P < 0.05$ .

279

### 280 **Enrichment analysis of KEGG modules**

281 Differentially enriched KEGG modules were identified according to reporter Z-scores  
282 [34]. Z-score for each KO was first calculated from Benjamín-Hochberg (BH)-adjusted P values  
283 from Wilcoxon rank-sum tests of comparisons between each two groups. The aggregated Z-score  
284 for each module was calculated using Z-scores of all individual KOs belonging to the  
285 corresponding module. A module was considered significant at a  $|\text{reporter Z-score}| \geq$   
286 1.96.

287

### 288 **Other statistical analyses**

289 Kruskal–Wallis test was conducted to detect the differences in continuous phenotypic  
290 factors, microbial diversity, richness and MLG relative abundances between

291 multi-groups. *Dunn's post hoc* tests followed by pairwise comparisons were applied to  
292 explore the differential phenotypes and MLGs between each two groups (R version  
293 3.3.2, PMCMR package 4.1). The *Dunn's post hoc* p-values were adjusted with  
294 the Benjamini-Hochberg method among multiple pairwise comparisons. The  
295 significance cut-off was set as a *Dunn's post hoc* *P* value less than 0.05. Wilcoxon  
296 rank-sum test was performed for comparisons of MLG relative abundances between  
297 published TN-T2D patients from Shanghai [9] and NGT or Pre-DM from the Suzhou  
298 cohort in this study for validation purposes. The significance cut-off of Wilcoxon  
299 rank-sum test was set as a *P* value less than 0.05. Detailed information on enrichment  
300 of MLGs between groups is provided in **Table S5**.

301 Wilcoxon rank-sum test was conducted to detect differences in protein levels between  
302 each two groups. The significance cut-off for proteins was set as a *P* value less than  
303 0.05, and a fold change of protein levels > 1.2 or < 0.8. Chi-square test was conducted  
304 to detect the distribution of differences in discrete phenotypic factors, such as sex and  
305 treatment distribution between groups, and to identify differences in taxonomic and  
306 functional assignments between metagenomic and metaproteomic datasets. The  
307 significant cut-off was set as *P* value less than 0.05.

308

### 309 **Data availability**

310 Metagenomic sequencing data for 254 faecal samples can be accessed from China  
311 Nucleotide Sequence Archive (CNSA) with the dataset identifier CNP0000175. The  
312 mass spectrometry metaproteomics data have been deposited to the ProteomeXchange  
313 Consortium via the PRIDE partner repository with the dataset identifier PXD013452  
314 and 10.6019/PXD013452.

315

## 316 **Results**

### 317 **Experimental design**

318 The cohort consisted of 77 TN-T2D patients, 80 Pre-DM individuals and 97 NGT  
319 individuals from Suzhou, China (**Methods, Table S1**). The three groups were

320 matched regarding body mass index (BMI) and sex ( $P > 0.05$ ), but individuals with  
321 TN-T2D (mean age 66 +/- 8 years) were on average 5 years older than individuals in  
322 the two other groups (**Table S1**). Shotgun metagenomics was performed on faecal  
323 samples from all participants, whereas metaproteomics profiling was performed on a  
324 subgroup of 84 participants, including 28 age-, sex-, and BMI-matched individuals  
325 from each group (**Figure 1**).

326

### 327 **Distinct metagenomics profiles in Chinese prediabetic and type 2 diabetic** 328 **individuals**

329 Shotgun metagenomic sequencing of the 254 stool DNA samples was performed  
330 using the BGISEQ-500 platform and raw reads were filtered and aligned to the  
331 integrated gene catalogue (IGC) of the human gut microbiome to generate gene,  
332 taxonomic and functional profiles as previously described (**Methods, Table S2**). In  
333 line with previous studies [4–6], no significant differences in microbial gene-based  
334 richness, alpha-diversity, and beta-diversity were found between the NGT, Pre-DM,  
335 and TN-T2D individuals (**Figure S3**, Kruskal-Wallis (KW) test,  $P > 0.05$ ). Using a  
336 metagenome-wide association approach [4], we identified 266,015  
337 T2D-associated genes (KW test,  $P < 0.05$ ) and clustered these genes into 126  
338 metagenomic linkage groups (MLGs,  $\geq 100$  genes, **Table S5**).

339 We further applied the KW test to detect statistically significant differences in the  
340 relative abundances of MLGs between individuals with NGT, Pre-DM, and TN-T2D.  
341 Compared to NGT individuals, the abundances of MLGs from the *Clostridia* class,  
342 such as *Butyrivibrio crossotus* (MLG-2076), *Dialister invisus* (MLG-3376) and  
343 *Roseburia hominis* (MLG-14865 and MLG-14920) were significantly lower in  
344 individuals with Pre-DM or TN-T2D (**Figure 2A, Table S5**, *Dunn's post hoc test*,  $P <$   
345  $0.05$ ), which is in agreement with previous findings in a Danish T2D cohort [6]. In  
346 addition, we found that the abundance of the butyrate-producing *Faecalibacterium*  
347 *prausnitzii* (MLG-4560) was lower in Pre-DM compared to both NGT and TN-T2D  
348 individuals. On the contrary, MLGs annotated to *Escherichia coli* (MLG-7919 and  
349 MLG-7840), *Streptococcus salivarius* (MLG-6991 and MLG-7099), and *Eggerthella*

350 *sp.* (MLG-351) were highly enriched in Pre-DM compared to NGT individuals  
351 (**Figure 2A**,  $P < 0.05$ ). An increased abundance of *Streptococcus* operational  
352 taxonomic units (OTUs) was also recently reported in a Danish prediabetic cohort [7].  
353 Additionally, Pre-DM individuals also exhibited a significant enrichment in *E. coli*  
354 abundance compared to TN-T2D individuals (**Figure 2A**,  $P < 0.05$ ). Moreover, we  
355 detected significantly lower abundances of *Akkermansia muciniphila* (MLG-2159)  
356 and *Clostridium bartlettii* (MLG-7540) and higher abundances of *Bacteroides caccae*  
357 (MLG-10234 and MLG-10325), *Bacteroides finegoldii* (MLG-10154 and  
358 MLG-10159), and *Collinsella intestinalis* (MLG-10084) in TN-T2D patients  
359 compared with NGT and Pre-DM individuals (**Figure 2A**,  $P < 0.05$ ). Finally, the  
360 abundance of *Megasphaera elsdenii* (MLG-1568) was significantly higher in both  
361 TN-T2D and Pre-DM individuals than in NGT individuals (**Figure 2A**,  $P < 0.05$ ), in  
362 line with the positive correlation between the relative abundance of the genus  
363 *Megasphaera* and T2D recently reported in a large cohort with about 7000 individuals  
364 from South China [35]. Several key findings were further validated in faecal samples  
365 of 94 treatment naïve T2D patients in Shanghai (Gu et al., 2017a), such as a lower  
366 abundance of *A. muciniphila* and *C. bartlettii* compared to NGT and Pre-DM  
367 individuals, and a lower abundance of *E.coli* compared to Pre-DM individuals in this  
368 study (**Figure 2A**, **Table S5**, Wilcoxon rank test,  $P < 0.05$ ). A summary of gut  
369 microbial taxa reported in previously published cross-sectional T2D or prediabetes  
370 studies is presented in **Table S6**.

371 We next performed Spearman's rank correlation analysis to explore the associations  
372 between host phenotypes and MLGs. *M. elsdenii* and four unannotated MLGs  
373 enriched in TN-T2D individuals showed significantly positive correlations to  
374 glycaemic indices, including homeostasis model assessment of insulin resistance  
375 (HOMA-IR), fasting blood glucose (FBG), 2h post-load glucose (2h-PG), and HbA1c,  
376 whereas MLGs enriched in NGT were negatively correlated with the abovementioned  
377 indices (adjusted  $P < 0.05$ , **Figure S4A-B**). Very few MLGs showed significant  
378 correlations with non-glycaemic indices, such as age, BMI and systolic blood pressure

379 (SBP) (**Figure S4**).

380 To assess the discriminative power of MLGs in T2D and identify key MLGs  
381 differentiating individuals with respect to different disease stages, we applied a  
382 feature selection approach and constructed Random Forest (RF) classification models  
383 comparing the groups (**Methods**). Remarkably, the RF models provided high  
384 performances regarding classification of samples from the two different disease stages,  
385 with area under the ROC curve (AUC) values from 0.90 to 0.94 (**Figure 2B**). Apart  
386 from taxonomically unclassified MLGs, the most discriminatory MLG for separating  
387 TN-T2D and NGT was *A. muciniphila*. Moreover, MLGs annotated to *F. prausnitzii*  
388 and *E. coli* both showed to be important in separating Pre-DM samples from TN-T2D  
389 and NGT samples (**Figure 2C**), indicating the unique microbial signatures of lower  
390 abundance of *F. prausnitzii* and higher abundance of *E. coli* in Pre-DM individuals.  
391 We also validated the predictive power of the RF models between TN-T2D and other  
392 two groups, which showed an accuracy of 76. 6% (72 of 94 patients) for disease  
393 prediction in a previously described TN-T2D cohort from Shanghai (**Table S7**) [9].  
394 We next performed KEGG enrichment analyses to examine possible differential  
395 patterns of microbial functional potentials in NGT, Pre-DM and TN-T2D individuals  
396 (**Table S8**). Interestingly, we observed a significant enrichment in modules  
397 comprising several sugar phosphotransferase systems (PTS), ATP-binding cassette  
398 transporters (ABC transporters) of amino acids, and bacterial secretion systems in the  
399 gut microbiota of Pre-DM compared to NGT individuals (reporter score  $\geq 1.96$ ,  
400 **Figure 2D**). Likewise, in line with previous findings in several Chinese cohorts with  
401 metabolic diseases, such as atherosclerotic cardiovascular disease (ACVD), obesity  
402 and T2D [36], a similar enrichment was found in TN-T2D patients compared with  
403 NGT individuals (**Figure 2D**). The abundances of the transport system for microcin C,  
404 a peptide-nucleotide antibiotic produced by *Enterobacteria* [37], and the transport  
405 system for autoinducer-2 (AI-2), a quorum sensing signalling molecule reported in  
406 Proteobacteria [38], were also significant higher in Pre-DM than in NGT individuals  
407 (**Figure 2D**). Except for enrichment of type II-IV secretion and AI-2 transport systems

408 in Pre-DM vs TN-T2D, we found no other KEGG modules for PTS and ABC  
409 transporters to differ significantly in abundance between Pre-DM and TN-T2D  
410 individuals (**Figure 2D**). However, Pre-DM individuals displayed a significant  
411 reduction with respect to several energy and nucleotide metabolism modules  
412 compared to both NGT and TN-T2D individuals, including modules of V-type ATPase,  
413 pyruvate: ferredoxin oxidoreductase, and bacterial ribosomal proteins (**Figure 2D**).  
414 Taken together, these results indicate the possible involvement of substantial  
415 compositional and functional disease-related gut microbial changes in the pre-diabetic  
416 stage.

417

#### 418 **Gut metaproteomics simultaneously identifies faecal levels of microbial and** 419 **human proteins**

420 To gain further insights into functional changes in the gut microbiota associated with  
421 T2D, we conducted metaproteomic analyses using iTRAQ (isobaric peptide tags for  
422 relative and absolute quantification) and LC-MS/MS-based protocols on 84 samples,  
423 with 28 samples derived from each of the three diagnostic groups (**Methods, Figure**  
424 **S1**). Using the strict parameters of 2 peptide-spectrum matches (PSMs) per protein, <  
425 10 ppm mass error and 1% PSM-level FDR (**Methods**), we identified a total of  
426 145,014 high quality PSMs corresponding to 15,670 proteins, including 15,245  
427 (97.29%) microbial proteins and 425 (2.71%) human proteins (**Table S9**). As reported  
428 [14,19,20], one microbial peptide often exhibits matches to multiple proteins with  
429 high sequence similarity, resulting in difficulties in identifying the microbial origin of  
430 individual peptides. To alleviate ambiguities, we applied a maximum parsimony  
431 principle reported in recent studies [14] [39] and generated 11,980 non-redundant  
432 meta-proteins (78.58% of microbial proteins) containing at least one unique microbial  
433 peptide. The relative intensities of these unique peptides were further used for  
434 meta-protein quantification (**Methods, Table S9**). The number of identified  
435 meta-proteins ranged between 5,067 in the Pre-DM samples to 8,134 in the TN-T2D  
436 samples (**Table S9**). Venn diagrams showed that only 2782 meta-proteins (34.2%-54.9%  
437 of the total number of meta-proteins per group) were shared among the three groups



438 (Figure S5A), indicating differential microbial expression patterns at the protein level  
439 among the groups. Taxonomic annotations indicated a higher percentage of unique  
440 Proteobacteria meta-proteins in Pre-DM individuals, compared to the other groups  
441 (Chi-square test,  $P < 0.05$ , Figure S5B), whereas no difference in the distributions of  
442 the uniquely detected meta-proteins associated with a wide range of functions was  
443 found between the three groups (Figure S5C).

444

#### 445 **Concordance and discordance of microbiota features between metagenomes and** 446 **metaproteomes**

447 Based on annotated microbial features, we next investigated the consistency as well as  
448 the divergence of microbial composition and function at the DNA and protein level.  
449 At the phylum level, more than 90% genes and meta-proteins were consistently  
450 assigned to three major phyla, namely Firmicutes, Bacteroidetes and Proteobacteria  
451 (Figure 3A). Despite the overall consistency, we found a significantly higher  
452 percentage of the annotated proteins to be assigned to Bacteroidetes (41%) compared  
453 to the percentage of genes annotated to Bacteroidetes (25%) (Chi-square test,  $P < 0.05$ ,  
454 Figure 3A), suggesting that Bacteroidetes might display an overall higher protein  
455 production than the other phyla across the 84 samples. At the genus level, the  
456 composition of the metaproteomes was biased towards a limited number of genera.  
457 Among 212 common metagenomically-identified genera detected in at least 10% of  
458 the 84 samples, only 81 genera (38.21%) could be detected based on metaproteomics  
459 (Table S10). Spearman's rank correlation analysis was subsequently performed to  
460 determine the relationship between the number of meta-proteins and the abundances  
461 at the genus level based on metagenomics. The more abundant a given genus was  
462 based on metagenomics analysis, the more of the identified meta-proteins were  
463 assigned to this genus (Spearman's correlation coefficient (SCC) = 0.726,  $P =$   
464 5.21E-08, Figure 3B, Table S9), with *Bacteroides* (n=1664), *Prevotella* (n=818) and  
465 *Faecalibacterium* (n=719) harbouring most assigned meta-proteins. For a few genera,  
466 such as *Anaerotruncus* (n=9), *Paraprevotella* (n=9) and *Enterococcus* (n=7), we were

467 only able to identify less than 10 meta-proteins although their median metagenomic  
468 abundances were greater than 1E-04 (**Table S10**).

469 Comparing KEGG functional categories based on metagenomics and metaproteomics  
470 data, we observed large differences in the relative contribution of individual  
471 categories between the two datasets (Chi-square test,  $P < 0.05$ , **Figure 3C**), in  
472 accordance with several previous studies [14,19,20]. For instance, as determined by  
473 metaproteomics, 24% and 18% of the proteins were assigned to carbohydrate  
474 metabolism and translation categories, whereas the corresponding metagenomic  
475 percentages of the two categories were only 11% and 4%, respectively (**Figure 3C**).  
476 We found that 1508 meta-proteins, accounting for 12.59% of all identified  
477 meta-proteins, could be assigned to 10 KEGG orthologues (KO). The top KOs  
478 harboured 360 proteins annotated as Ca-activated chloride channel homologues  
479 (K07114), whereas the remaining KOs comprised proteins representing abundant  
480 house-keeping proteins such as elongation factors, large subunit ribosomal proteins  
481 (K02355, K02358 and K02395), chaperones (K04077 and K04043), and  
482 glyceraldehyde 3-phosphate dehydrogenase (K00134) as well as flagellin proteins  
483 (K02406) (**Table S11, Figure S6A**).

484 Aiming to link the microbial protein patterns to metagenomic microbial abundances,  
485 we next conducted a fold-change analysis of meta-proteins. In agreement with our  
486 metagenomic findings (**Figure 2A**), the Proteobacteria meta-proteins (mainly from  
487 *Escherichia*, *Citrobacter* and *Enterobacter*) exhibited enrichment in the Pre-DM  
488 group, whereas *Bacteroides* meta-proteins were enriched in TN-T2D individuals  
489 (**Figure 3D, Table S12**,  $P < 0.05$  and fold change of protein intensities  $> 1.2$ ).  
490 Surprisingly, *Prevotella* meta-proteins were selectively enriched in Pre-DM  
491 individuals (**Figure 3D**), although no *Prevotella* annotated metagenomic MLGs  
492 exhibited significantly higher abundance. At the functional level, we observed that the  
493 level of meta-proteins involved in carbohydrate metabolism tended to be lower in  
494 NGT compared to Pre-DM and TN-T2D individuals, including those involved in the  
495 metabolism of succinate (**Figure 3E, Figure S6B, Table S11**).

496

497 **Functional characteristics of faecal excreted human proteins in T2D**

498 Among the 425 detected human proteins, we identified 218 human proteins that were  
499 shared among the NGT, Pre-DM, and TN-T2D groups, accounting for 59.6% to 85.2%  
500 of the identified human proteins in each group (**Figure S7A**). We next annotated the  
501 human proteins with Gene Ontology (GO) terms to obtain insight into the functional  
502 characteristics of the human proteins excreted in faeces (**Table S13**). Among the  
503 identified proteins, 181 (42.59%) had previously been identified in faecal samples by  
504 metaproteomics, indicative of their general presence (**Table S14**) [14,19,20]. These  
505 included several intestinal mucin proteins, such as MUC-1, MUC-2, MUC-4, MUC5B,  
506 MUC12 and MUC-13 as well as members of annexins (ANXA1- ANXA7, a family of  
507 calcium-binding proteins) (**Table S14**). We identified 233 of the faecal human  
508 proteins to have tissue-specific annotation, amongst which 151 proteins (64.81%)  
509 were reported to exhibit high expression in the digestive system, and the remaining  
510 proteins were annotated to be highly expressed in blood or other tissues such as  
511 epidermis (**Table S13**). Of interest, 18 of the human proteins were annotated as AMPs  
512 [40] (**Table S13**). Several human proteins involved in glucose metabolism, including  
513 the sodium/glucose cotransporter 1, were detected in faecal samples of TN-T2D  
514 patients only (**Figure S6B**). Inhibitors of this protein have been proposed for  
515 antidiabetic treatment <sup>26</sup>. Additionally, the TMAO-producing enzyme, dimethylaniline  
516 monooxygenase [N-oxide-forming] 3 (FMO3) was also identified exclusively in the  
517 TN-T2D group (**Table S13**). On the other hand, we found that ras  
518 GTPase-activating-like protein (IQGAP1) and unconventional myosin-Ic (MYO1C)  
519 were uniquely identified in the NGT group (**Figure S7B**). Loss of IQGAP1 and  
520 MYO1C has been related to impairment of insulin signalling [43–45], but whether  
521 their presence in faeces has functional implications remains to be established.

522

523 Forty-nine of the human proteins present in faeces were found to differ significantly  
524 in intensity between at least two of the groups (**Figure 4A, Table S15**). We found

525 significantly higher levels of four AMPs, including defensin-5, neutrophil defensin-1,  
526 lysozyme c, as well as secreted phospholipase A2, all with important roles in the  
527 defence against bacteria [46–48], in faecal samples from NGT individuals than in  
528 samples from TN-T2D individuals (**Figure 4A**). We also found higher levels of  
529 mucin-5AC samples from NGT compared to TN-T2D individuals, suggesting  
530 possible effects on the mucus barrier in TN-T2D. Interestingly, the level of the  
531 antimicrobial cathepsin G, reported to inhibit the growth of several organisms from  
532 the Proteobacteria phylum [49], was higher in samples from Pre-DM than NGT and  
533 TN-T2D, and this was coupled to lower levels of alpha-1-antichymotrypsin and  
534 alpha-1-antitrypsin, both known inhibitors of cathepsin G [50] (**Figure 4A**),  
535 suggesting that Pre-DM individuals have initiated strategies to activate a defence  
536 system against the enhanced relative abundances of *E. coli*. By contrast, we found that  
537 several proteins within the immunoglobulin superfamily were present at lower levels  
538 in samples from Pre-DM compared to NGT or TN-T2D (**Figure 4A**). Individuals with  
539 Pre-DM also exhibited lower levels of galectin-3, a lectin with  
540 beta-galactoside-binding ability. Galectin-3 has been reported to bind  
541 lipopolysaccharides (LPS) from *E. coli* and play a role as a negative regulator of  
542 LPS-mediated inflammation [51]. In addition, galectin-3 was also reported to improve  
543 epithelial intercellular contact via desmoglein-2 stabilization [52]. Taken together,  
544 these finding indicate that the gut ecosystem in Pre-DM individuals exhibits trait  
545 compatible with the upregulation of defence systems against an increased abundance  
546 of Proteobacteria simultaneously with the downregulation of factors capable of  
547 reducing the impact of the inflammation-inducing activity of LPS. We also found that  
548 several digestive enzymes differed in levels in faeces from NGT, Pre-DM, and  
549 TN-T2D individuals. Thus, we found lower levels of proteases (trypsin and  
550 chymotrypsin and their precursors) and lipases, and higher amylase (AMY1) levels in  
551 TN-T2D (**Figure 4A**). It is also interesting to note that the level of dipeptidyl  
552 peptidase 4 (DDP4), known to inhibit insulin secretion via its action on GLP-1, was  
553 lower in individuals with Pre-DM than in TN-T2D individuals. A network analysis

554 revealed significant correlations between 20 human proteins showing significant  
555 differences in levels in two-pairwise comparisons between NGT, Pre-DM and  
556 TN-T2D individuals (**Figure 4B**). For instance, we identified a negative correlation  
557 between the defensin-5 and TN-T2D-enriched peptidyl-prolyl cis-trans isomerase B  
558 (PPIB) (**Figure 4B**, SCC, adjusted  $P < 0.05$ ), the latter previously reported to be  
559 associated with islet dysfunction [53].

560 Aiming to investigate possible host-microbial protein interactions in the human gut,  
561 we next investigate the possible correlation between the discriminatory bacterial and  
562 human proteins. Interestingly, we found significantly negative correlations between  
563 several Pre-DM-enriched *E. coli* proteins and human proteins involved in innate  
564 immune responses (HV304, HV305) and adhesion (CEAM6, CEAM7), whereas  
565 positive correlations were found between *E. coli* proteins and cathepsin G,  
566 Cytochrome c (CYC) and trypsin-1 (TRY1) (**Figure 4C**, adjusted  $P < 0.05$ ).  
567 Conversely, NGT-enriched proteins from *F. prausnitzii* showed positive correlations  
568 with several NGT-enriched digestive enzymes from the exocrine pancreas, such as  
569 chymotrypsin-like elastase family member 3A (CEL3A), chymotrypsinogen B2  
570 (CTRB2) and carboxypeptidases (CBPA1 and CBPB1).

571

## 572 **Discussion**

573 Our comparative study using metagenomics and metaproteomics in normal glucose  
574 tolerant, pre-diabetics and treatment naïve T2D individuals provides important novel  
575 findings with regard to disease-stage specifications at the gut bacterial and host level.  
576 A substantial number of Pre-DM associated features were revealed at both the  
577 metagenomics and metaproteomics level. Of specific note are the significantly higher  
578 abundance of Proteobacteria species (dominated by *E. coli*) and the lower levels of  
579 host proteins which potentially are involved in Proteobacteria-specific responses in  
580 Pre-DM, such as galectin-3 and proteins within the immunoglobulin superfamily.  
581 Furthermore, significantly higher levels of *Prevotella* proteins were uniquely detected  
582 in Pre-DM individuals although the abundance of *Prevotella* was not significantly

583 enriched in this group based on metagenomics data. *Prevotella copri* has previously  
584 been shown to produce branched-chain amino acids (BCAA), reported to correlate  
585 with BCAA blood levels and insulin resistance [54]. However, in the present study  
586 only two enzymes related to the synthesis of BCAAs were detected among the  
587 identified *Prevotella* proteins with no differences in levels between the three groups.

588

589 Only a modest number of relatively highly abundant faecal proteins were identified in  
590 the current study. This reflects the current methodological challenges in microbial  
591 protein extraction, identification, and annotation as reported previously [55,56], as  
592 well as the detection limitations of MS-based proteomics [57]. For instance, we  
593 identified less than 50 proteins from each of several taxa with median abundances in  
594 the 0.1 % ranges based on metagenomics data (such as NGT-enriched *Dialister*,  
595 *Butyrivibrio* and *Haemophilus*). Nevertheless, metaproteomics provides a valuable  
596 addition to not only estimating expression of microbial proteins, but also to delineate  
597 host-microbial protein interactions in different disease stages. In this regard, we  
598 identified higher levels of several host-derived AMPs in NGT individuals compared  
599 to TN-T2D and Pre-DM individuals, suggesting a possible stronger host defence  
600 against invading (disease-related) microbes in NGT individuals. By contrast,  
601 significant negative associations were found between Pre-DM-enriched *E. coli*  
602 proteins and several human proteins, including AMPs, adhesion molecules and  
603 galectin-3, all involved in intestinal barrier function. It is also worth to note the  
604 significant changes in levels and types of digestive enzymes identified in the faecal  
605 samples, where TN-T2D showed enhanced alpha-amylase (AMY1) levels, as  
606 compared to pancreatic-derived lipases and proteases. However, the level of  
607 pancreatic alpha-amylase (AMYP) was lower in Pre-DM compared to the two other  
608 groups. A metaproteomics study has reported lower faecal AMYP levels in type 1  
609 diabetes (T1D) patients compared to their healthy relatives<sup>10</sup>, whereas no difference  
610 in levels of AMY1 was reported between T1D and controls, suggesting different  
611 amylase responses might be present in Pre-DM, TN-T2D and T1D patients based on

612 metaproteomics data. Differences in levels of secreted digestive enzymes from the  
613 exocrine pancreas in NGT, Pre-DM and T2D have to our notice not been addressed  
614 previously, although it may be of major importance in relation to the metabolic state  
615 in T2D.

616 Together, our findings suggest that unique and nonlinear changes of the intestinal  
617 ecosystem might exist in Pre-DM individuals before transition to T2D. Further  
618 large-scale, longitudinal follow-up studies are needed to delineate how microbial  
619 functions changes from prediabetes to diabetes and to address the nature of  
620 interactions between the gut microbiota and the host in the transitional phases leading  
621 to overt T2D.

622

### 623 **Acknowledgements**

624 We thank Prof. Yan Ren for helpful discussion on designing the metaproteomic  
625 experiments. We thank Dr Cong Lin and Dr Zhe Zhang for helpful discussion and  
626 suggestions on developing the manuscript. We gratefully acknowledge colleagues at  
627 BGI for DNA extraction, library preparation and shotgun sequencing experiments,  
628 and helpful discussions.

### 629 **Funding Sources**

630 This work was supported by grants from National Key Research and Development  
631 Program of China (No. 2017YFC0909703), Shenzhen Municipal Government of  
632 China (No. JCYJ20170817145809215) and National Natural Science Foundation of  
633 China (No. 31601073).

634

### 635 **Declarations of interests**

636 The authors declare no competing interests.

637

### 638 **Author contributions**

639 J.L. and H.Z. designed and coordinated the study. F.L. and J.Z. oversaw the blood and  
640 faecal sample collection. Y.L., B.C., J.C., X. B., Y.H. and Y.G. participated in sample

641 collection and provided phenotypic information. G.H., B.Z, J.Z. and S.L. carried out  
642 the metaproteomic experiments. H.Z., H.R., F.Y., Z.S, and H.Zou. performed the  
643 bioinformatic analyses of metagenomic data. H.Z., H.R., C.F., B.Z, G.H., Y.Z. and  
644 J.W. performed the bioinformatic analyses of metaproteomic data. H.Z. and H.R  
645 performed integrative analyses of metagenomic and metaproteomic data. Y.Z.  
646 performed revision of the figures. H.Z. interpreted together with J.L., S.B. and K.K.  
647 the data and wrote the first version of the manuscript. J.L., K.K., S.B., and L.M.  
648 performed revision of the manuscript. H.Z., H.R., C.F., G.H., F.Y., Z.Y., Y.Z., Z.S.,  
649 J.W, L.M., S.B., K.K. and J.L. participated in discussions. All authors contributed to  
650 the revision of the manuscript. All authors read and approved the final manuscript.

651

652



653 **Reference**

- 654 [1] Stumvoll M, Goldstein BJ, Van Haeften TW. Type 2 diabetes: Principles of  
655 pathogenesis and therapy. *Lancet*, vol. 365, 2005, p. 1333–46.  
656 doi:10.1016/S0140-6736(05)61032-X.
- 657 [2] Pickup JC. Inflammation and Activated Innate Immunity in the Pathogenesis of  
658 Type 2 Diabetes. *Diabetes Care* 2004;27:813–23.  
659 doi:10.2337/diacare.27.3.813.
- 660 [3] Wang L, Gao P, Zhang M, Huang Z, Zhang D, Deng Q, et al. Prevalence and  
661 ethnic pattern of diabetes and prediabetes in China in 2013. *JAMA - J Am Med*  
662 *Assoc* 2017;317:2515–23. doi:10.1001/jama.2017.7596.
- 663 [4] Wang J, Qin J, Li Y, Cai Z, Li S, Zhu J, et al. A metagenome-wide association  
664 study of gut microbiota in type 2 diabetes. *Nature* 2012;490:55–60.  
665 doi:10.1038/nature11450.
- 666 [5] Karlsson FH, Tremaroli V, Nookaew I, Bergström G, Behre CJ, Fagerberg B,  
667 et al. Gut metagenome in European women with normal, impaired and diabetic  
668 glucose control. *Nature* 2013. doi:10.1038/nature12198.
- 669 [6] Forslund K, Hildebrand F, Nielsen T, Falony G, Le Chatelier E, Sunagawa S,  
670 et al. Disentangling type 2 diabetes and metformin treatment signatures in the  
671 human gut microbiota. *Nature* 2015;528:262–6. doi:10.1038/nature15766.
- 672 [7] Allin KH, Tremaroli V, Caesar R, Jensen BAH, Damgaard MTF, Bahl MI, et al.  
673 Aberrant intestinal microbiota in individuals with prediabetes. *Diabetologia*  
674 2018;61:810–20. doi:10.1007/s00125-018-4550-1.
- 675 [8] Wu H, Esteve E, Tremaroli V, Khan MT, Caesar R, Mannerås-Holm L, et al.  
676 Metformin alters the gut microbiome of individuals with treatment-naïve type 2  
677 diabetes, contributing to the therapeutic effects of the drug. *Nat Med*  
678 2017;23:850–8. doi:10.1038/nm.4345.
- 679 [9] Gu Y, Wang X, Li J, Zhang Y, Zhong H, Liu R, et al. Analyses of gut  
680 microbiota and plasma bile acids enable stratification of patients for  
681 antidiabetic treatment. *Nat Commun* 2017;8:1785.

- 682 doi:10.1038/s41467-017-01682-2.
- 683 [10] Zhao L, Chen Y, Xia F, Abudukerimu B, Zhang W, Guo Y, et al. A  
684 glucagon-like peptide-1 receptor agonist lowers weight by modulating the  
685 structure of gut microbiota. *Front Endocrinol (Lausanne)* 2018.  
686 doi:10.3389/fendo.2018.00233.
- 687 [11] Moreira G V., Azevedo FF, Ribeiro LM, Santos A, Guadagnini D, Gama P, et  
688 al. Liraglutide modulates gut microbiota and reduces NAFLD in obese mice. *J*  
689 *Nutr Biochem* 2018. doi:10.1016/j.jnutbio.2018.07.009.
- 690 [12] Olivares M, Neyrinck AM, Pötgens SA, Beaumont M, Salazar N, Cani PD, et  
691 al. The DPP-4 inhibitor vildagliptin impacts the gut microbiota and prevents  
692 disruption of intestinal homeostasis induced by a Western diet in mice.  
693 *Diabetologia* 2018. doi:10.1007/s00125-018-4647-6.
- 694 [13] Liao X, Song L, Zeng B, Liu B, Qiu Y, Qu H, et al. Alteration of gut  
695 microbiota induced by DPP-4i treatment improves glucose homeostasis.  
696 *EBioMedicine* 2019. doi:10.1016/j.ebiom.2019.03.057.
- 697 [14] Heintz-Buschart A, May P, Laczny CC, Lebrun LA, Bellora C, Krishna A, et al.  
698 Integrated multi-omics of the human gut microbiome in a case study of familial  
699 type 1 diabetes. *Nat Microbiol* 2016;2. doi:10.1038/nmicrobiol.2016.180.
- 700 [15] Abu-Ali GS, Mehta RS, Lloyd-Price J, Mallick H, Branck T, Ivey KL, et al.  
701 Metatranscriptome of human faecal microbial communities in a cohort of adult  
702 men. *Nat Microbiol* 2018;3:356–66. doi:10.1038/s41564-017-0084-4.
- 703 [16] Liu R, Hong J, Xu X, Feng Q, Zhang D, Gu Y, et al. Gut microbiome and  
704 serum metabolome alterations in obesity and after weight-loss intervention. *Nat*  
705 *Med* 2017;23:859–68. doi:10.1038/nm.4358.
- 706 [17] Schirmer M, Franzosa EA, Lloyd-Price J, McIver LJ, Schwager R, Poon TW,  
707 et al. Dynamics of metatranscription in the inflammatory bowel disease gut  
708 microbiome. *Nat Microbiol* 2018;3:337–46. doi:10.1038/s41564-017-0089-z.
- 709 [18] Bajaj JS, Thacker LR, Fagan A, White MB, Gavis EA, Hylemon PB, et al. Gut  
710 microbial RNA and DNA analysis predicts hospitalizations in cirrhosis. *JCI*

- 711 Insight 2018;3:1–12. doi:10.1172/jci.insight.98019.
- 712 [19] Verberkmoes NC, Russell AL, Shah M, Godzik A, Rosenquist M, Halfvarson J,  
713 et al. Shotgun metaproteomics of the human distal gut microbiota. *ISME J*  
714 2009;3:179–89. doi:10.1038/ismej.2008.108.
- 715 [20] Young JC, Pan C, Adams RM, Brooks B, Banfield JF, Morowitz MJ, et al.  
716 Metaproteomics reveals functional shifts in microbial and human proteins  
717 during a preterm infant gut colonization case. *Proteomics* 2015;15:3463–73.  
718 doi:10.1002/pmic.201400563.
- 719 [21] Zhong H, Fang C, Fan Y, Lu Y, Wen B, Ren H, et al. Lipidomic profiling  
720 reveals distinct differences in plasma lipid composition in healthy, prediabetic,  
721 and type 2 diabetic individuals. *Gigascience* 2017;6.  
722 doi:10.1093/gigascience/gix036.
- 723 [22] Fang C, Zhong H, Lin Y, Chen B, Han M, Ren H, et al. Assessment of the  
724 cPAS-based BGISEQ-500 platform for metagenomic sequencing. *Gigascience*  
725 2018;7:1–8. doi:10.1093/gigascience/gix133.
- 726 [23] Li J, Jia H, Cai X, Zhong H, Feng Q, Sunagawa S, et al. An integrated catalog  
727 of reference genes in the human gut microbiome. *Nat Biotechnol*  
728 2014;32:834–41. doi:10.1038/nbt.2942.
- 729 [24] Zou Y, Xue W, Luo G, Deng Z, Qin P, Guo R, et al. 1,520 reference genomes  
730 from cultivated human gut bacteria enable functional microbiome analyses. *Nat*  
731 *Biotechnol* 2019. doi:10.1038/s41587-018-0008-8.
- 732 [25] Austin PC. An introduction to propensity score methods for reducing the  
733 effects of confounding in observational studies. *Multivariate Behav Res*  
734 2011;46:399–424. doi:10.1080/00273171.2011.568786.
- 735 [26] Wiśniewski JR, Zougman A, Nagaraj N, Mann M. Universal sample  
736 preparation method for proteome analysis. *Nat Methods* 2009;6:359–62.  
737 doi:10.1038/nmeth.1322.
- 738 [27] Guo J, Ren Y, Hou G, Wen B, Xian F, Chen Z, et al. A Comprehensive  
739 Investigation toward the Indicative Proteins of Bladder Cancer in Urine: From

- 740           Surveying Cell Secretomes to Verifying Urine Proteins. *J Proteome Res*  
741           2016;15:2164–77. doi:10.1021/acs.jproteome.6b00106.
- 742 [28] Pappin DJC, Creasy DM, Cottrell JS. Probability-based Protein Identification  
743           by Searching Sequence Databases Using Mass Spectrometry Data.  
744           *Electrophoresis* 1999;20:3551–67.
- 745 [29] Elias JE, Gygi SP. Target-Decoy Search Strategy for Mass Spectrometry-Based  
746           Proteomics. *Proteome Bioinforma* 2010;55–71.  
747           doi:10.1007/978-1-60761-444-9\_5.
- 748 [30] Brosch M, Yu L, Hubbard T, Choudhary J. Accurate and sensitive peptide  
749           identification with mascot percolator. *J Proteome Res* 2009;8:3176–81.  
750           doi:10.1021/pr800982s.
- 751 [31] Wen B, Zhou R, Feng Q, Wang Q, Wang J, Liu S. IQuant: An automated  
752           pipeline for quantitative proteomics based upon isobaric tags. *Proteomics*  
753           2014;14:2280–5. doi:10.1002/pmic.201300361.
- 754 [32] Max K, Kuhn M. Building Predictive Models in R Using the caret Package. *J*  
755           *Stat Softw* 2008. doi:10.1053/j.sodo.2009.03.002.
- 756 [33] Tett A, Pasolli E, Farina S, Truong DT, Asnicar F, Zolfo M, et al. Unexplored  
757           diversity and strain-level structure of the skin microbiome associated with  
758           psoriasis. *Npj Biofilms Microbiomes* 2017;3. doi:10.1038/s41522-017-0022-5.
- 759 [34] Patil KR, Nielsen J. Uncovering transcriptional regulation of metabolism by  
760           using metabolic network topology. *Proc Natl Acad Sci* 2005;102:2685–9.  
761           doi:10.1073/pnas.0406811102.
- 762 [35] He Y, Wu W, Zheng HM, Li P, McDonald D, Sheng HF, et al. Regional  
763           variation limits applications of healthy gut microbiome reference ranges and  
764           disease models. *Nat Med* 2018. doi:10.1038/s41591-018-0164-x.
- 765 [36] Jie Z, Xia H, Zhong SL, Feng Q, Li S, Liang S, et al. The gut microbiome in  
766           atherosclerotic cardiovascular disease. *Nat Commun* 2017;8:845.  
767           doi:10.1038/s41467-017-00900-1.
- 768 [37] Rebuffat S. Microcins in action: amazing defence strategies of Enterobacteria.

- 769 Biochem Soc Trans 2012;40:1456–62. doi:10.1042/BST20120183.
- 770 [38] Pereira CS, Thompson JA, Xavier KB. AI-2-mediated signalling in bacteria.  
771 FEMS Microbiol Rev 2013;37:156–81.  
772 doi:10.1111/j.1574-6976.2012.00345.x.
- 773 [39] Muth T, Behne A, Heyer R, Kohrs F, Benndorf D, Hoffmann M, et al. The  
774 MetaProteomeAnalyzer: A powerful open-source software suite for  
775 metaproteomics data analysis and interpretation. J Proteome Res  
776 2015;14:1557–65. doi:10.1021/pr501246w.
- 777 [40] Wang G, Li X, Wang Z. APD3: The antimicrobial peptide database as a tool  
778 for research and education. Nucleic Acids Res 2016;44:D1087–93.  
779 doi:10.1093/nar/gkv1278.
- 780 [41] Song P, Onishi A, Koepsell H, Vallon V. Sodium glucose cotransporter SGLT1  
781 as a therapeutic target in diabetes mellitus. Expert Opin Ther Targets  
782 2016;20:1109–25. doi:10.1517/14728222.2016.1168808.
- 783 [42] Van De Laar FA, Lucassen PL, Akkermans RP, Van De Lisdonk EH, Rutten  
784 GE, Van Weel C.  $\alpha$ -Glucosidase inhibitors for patients with type 2 diabetes:  
785 Results from a Cochrane systematic review and meta-analysis. Diabetes Care  
786 2005;28:154–63. doi:10.2337/diacare.28.1.154.
- 787 [43] Rittmeyer EN, Daniel S, Hsu S-C, Osman MA. A dual role for IQGAP1 in  
788 regulating exocytosis. J Cell Sci 2008;121:391–403. doi:10.1242/jcs.016881.
- 789 [44] Chawla B, Hedman AC, Sayedyahosseini S, Erdemir HH, Li Z, Sacks DB.  
790 Absence of IQGAP1 protein leads to insulin resistance. J Biol Chem  
791 2017;292:3273–89. doi:10.1074/jbc.M116.752642.
- 792 [45] Yip MF, Ramm G, Larance M, Hoehn KL, Wagner MC, Guilhaus M, et al.  
793 CaMKII-Mediated Phosphorylation of the Myosin Motor Myo1c Is Required  
794 for Insulin-Stimulated GLUT4 Translocation in Adipocytes. Cell Metab  
795 2008;8:384–98. doi:10.1016/j.cmet.2008.09.011.
- 796 [46] Wiesner J, Vilcinskas A. Antimicrobial peptides: The ancient arm of the human  
797 immune system. Virulence 2010;1:440–64. doi:10.4161/viru.1.5.12983.

- 798 [47] Vidarsson G, Dekkers G, Rispens T. IgG subclasses and allotypes: From  
799 structure to effector functions. *Front Immunol* 2014;5.  
800 doi:10.3389/fimmu.2014.00520.
- 801 [48] Nevalainen TJ, Graham GG, Scott KF. Antibacterial actions of secreted  
802 phospholipases A2. Review. *Biochim Biophys Acta - Mol Cell Biol Lipids*  
803 2008;1781:1–9. doi:10.1016/j.bbalip.2007.12.001.
- 804 [49] MacIvor DM, Shapiro SD, Pham CT, Belaouaj A, Abraham SN, Ley TJ.  
805 Normal neutrophil function in cathepsin G-deficient mice. *Blood*  
806 1999;94:4282–93.
- 807 [50] Duranton J, Adam C, Bieth JG. Kinetic mechanism of the inhibition of  
808 cathepsin G by  $\alpha$ 1- antichymotrypsin and  $\alpha$ 1-proteinase inhibitor. *Biochemistry*  
809 1998;37:11239–45. doi:10.1021/bi980223q.
- 810 [51] Li Y, Komai-Koma M, Gilchrist DS, Hsu DK, Liu F-T, Springall T, et al.  
811 Galectin-3 Is a Negative Regulator of Lipopolysaccharide-Mediated  
812 Inflammation. *J Immunol* 2008;181:2781–9.  
813 doi:10.4049/jimmunol.181.4.2781.
- 814 [52] Jiang K, Rankin CR, Nava P, Sumagin R, Kamekura R, Stowell SR, et al.  
815 Galectin-3 regulates desmoglein-2 and intestinal epithelial intercellular  
816 adhesion. *J Biol Chem* 2014;289:10510–7. doi:10.1074/jbc.M113.538538.
- 817 [53] Lu H, Yang Y, Allister EM, Wijesekara N, Wheeler MB. The Identification of  
818 Potential Factors Associated with the Development of Type 2 Diabetes. *Mol*  
819 *Cell Proteomics* 2008;7:1434–51. doi:10.1074/mcp.M700478-MCP200.
- 820 [54] Pedersen HK, Gudmundsdottir V, Nielsen HB, Hyotylainen T, Nielsen T,  
821 Jensen BAH, et al. Human gut microbes impact host serum metabolome and  
822 insulin sensitivity. *Nature* 2016;535:376–81. doi:10.1038/nature18646.
- 823 [55] Wilmes P, Heintz-Buschart A, Bond PL. A decade of metaproteomics: Where  
824 we stand and what the future holds. *Proteomics* 2015;15:3409–17.  
825 doi:10.1002/pmic.201500183.
- 826 [56] Heyer R, Schallert K, Zoun R, Becher B, Saake G, Benndorf D. Challenges and

827 perspectives of metaproteomic data analysis. *J Biotechnol* 2017;261:24–36.  
828 doi:10.1016/j.jbiotec.2017.06.1201.  
829 [57] Schubert OT, Röst HL, Collins BC, Rosenberger G, Aebersold R. Quantitative  
830 proteomics: Challenges and opportunities in basic and applied research. *Nat*  
831 *Protoc* 2017;12:1289–94. doi:10.1038/nprot.2017.040.  
832  
833

## 834 **Figure Legends**

### 835 **Figure 1. Experimental overview.**

836 254 participants were recruited from the Suzhou cohort and diagnosed as treatment  
837 naive T2D patients (TN-T2D, n=77, red), prediabetic individuals (Pre-DM, n=80,  
838 blue) or individuals with normal glucose tolerance (NGT, n=97, green). Each  
839 participant provided two stool samples. One set of stool samples was used for  
840 metagenomic shotgun sequencing, followed by IGC-based taxonomic and functional  
841 analyses. The other set of stool samples, comprising a total of 84 samples with 28  
842 age-, BMI- and sex-matched participants from each group, was selected for  
843 metaproteomic analyses using isobaric tags for relative and absolute  
844 quantitation (iTRAQ)-coupled-liquid chromatography tandem mass spectrometry  
845 (iTRAQ-LC-MS/MS) to provide information on the microbial and host proteins  
846 present in stool samples.

847 A total of 11, 980 meta-proteins and 425 human proteins were identified in this study.  
848 Microbial gene and protein profiling were used to determine alterations in the  
849 abundance of microbial taxa and functions, and human protein profiling was used to  
850 identify alterations in the abundance of human proteins in faecal samples from NGT,  
851 Pre-DM and TN-T2D individuals.

852

### 853 **Figure 2. Determination of alterations in the abundance of MLGs and functional** 854 **modules.**

855 (A) Heatmap of statistically significant annotated MLGs discriminating between  
856 TN-T2D, Pre-DM and NGT based on Z-scores. Red, MLGs enriched in high glucose  
857 groups, blue, MLGs enriched in low glucose groups. \*, indicates MLGs significantly  
858 differed between any two groups in the Suzhou cohort; *Dunn's post hoc* test,  $P < 0.05$ .  
859 #, indicates significant MLGs replicated in the treatment naïve T2D patients from  
860 Shanghai (Gu et al., 2017a) compared with Pre-DM and NGT in the Suzhou cohort;  
861 Wilcoxon rank-sum test,  $P < 0.05$  (See **Table S5** for full list).

862 (B) Performance of cross-validated random forest (RF) classification models using



863 relative abundance profiles of gut microbial MLGs, assessed by the area under the  
864 ROC curve (AUC), 95% confidence intervals (CI). Orange, AUC for the RF model  
865 classifying NGT (n=97) and Pre-DM (n=80). Grey, AUC for the RF model classifying  
866 NGT (n=97) and TN-T2D (n=77). Blue, AUC for the RF model classifying Pre-DM  
867 (n=80) and TN-T2D (n=77). The best cut-off points are marked on the ROC curves.

868 **(C)** Bar plot showing the 10 most discriminating MLGs in the RF models for  
869 distinguishing between NGT, Pre-DM and TN-T2D. The bar lengths indicate the  
870 importance of the selected MLGs, and colours represent enrichment in NGT (green),  
871 Pre-DM (blue) and TN-T2D (red).

872 **(D)** Differential enrichment of KEGG modules comparing TN-T2D, Pre-DM and  
873 NGT. Dashed lines indicate a reporter score of 1.96, corresponding to 95% confidence  
874 in a normal distribution.

875

876 **Figure 3. Concordance and discordance of gut microbiome features in**  
877 **metagenomes and metaproteomes.**

878 **(A)** Taxonomic distribution at the phylum level. Inner circle, metagenomes; Outer  
879 circle, metaproteomes.

880 **(B)** Spearman's rank correlation between the median relative abundances of genera in  
881 metagenomes of 84 samples selected for metaproteomics and the number of identified  
882 meta-proteins assigned to the same genus. **(C)** Functional distribution at KEGG level  
883 2. Inner circle, metagenomes; Outer circle, metaproteomes.

884 **(D-E)** Enrichment analysis of differentially expressed meta-proteins at taxonomic (d)  
885 and functional levels (e) comparing NGT, Pre-DM and TN-T2D individuals. The  
886 number of meta-proteins that exhibited significant differences in levels in each  
887 pairwise comparison is shown. Colours represent enrichment in NGT (green),  
888 Pre-DM (blue) and TN-T2D (red). Significant enrichment is defined as  $P < 0.05$   
889 (Wilcoxon rank-sum test) with a fold change of mean intensities  $> 1.2$  in pairwise  
890 comparisons.

891

892 **Figure 4. Characterisation of human proteins in faecal samples from Chinese**  
893 **NGT, Pre-DM, and TN-T2D individuals.**

894 **(A)** Heatmap showing levels of 49 discriminatory human proteins as fold change  
895 between each two groups. \*,  $P < 0.05$  and fold change of protein levels  $> 1.2$  or  $< 0.8$ .

896 **(B)** Protein-protein interaction network based on 20 discriminatory human proteins in  
897 at least two pair-wise comparisons. The group signatures indicate human proteins  
898 with significantly higher or lower levels in this group compared to others. Orange  
899 indicates higher protein levels and blue indicates lower protein levels.

900 **(C)** Protein-protein interactions based on discriminatory meta-proteins in pair-wise  
901 comparisons and discriminatory human proteins. Only discriminatory meta-proteins  
902 annotated to the corresponding taxon of the MLGs were selected for the analysis.

903 The circles indicate human proteins and diamonds indicate meta-proteins. Detailed  
904 information on the numbered meta-proteins is presented in **Table S12**. Colours  
905 represent protein enrichment in NGT (green), Pre-DM (blue) and TN-T2D (red). Pink  
906 line indicates positive correlation and grey line indicates negative correlation  
907 (Spearman's rank correlations, adjusted  $P < 0.05$ ).

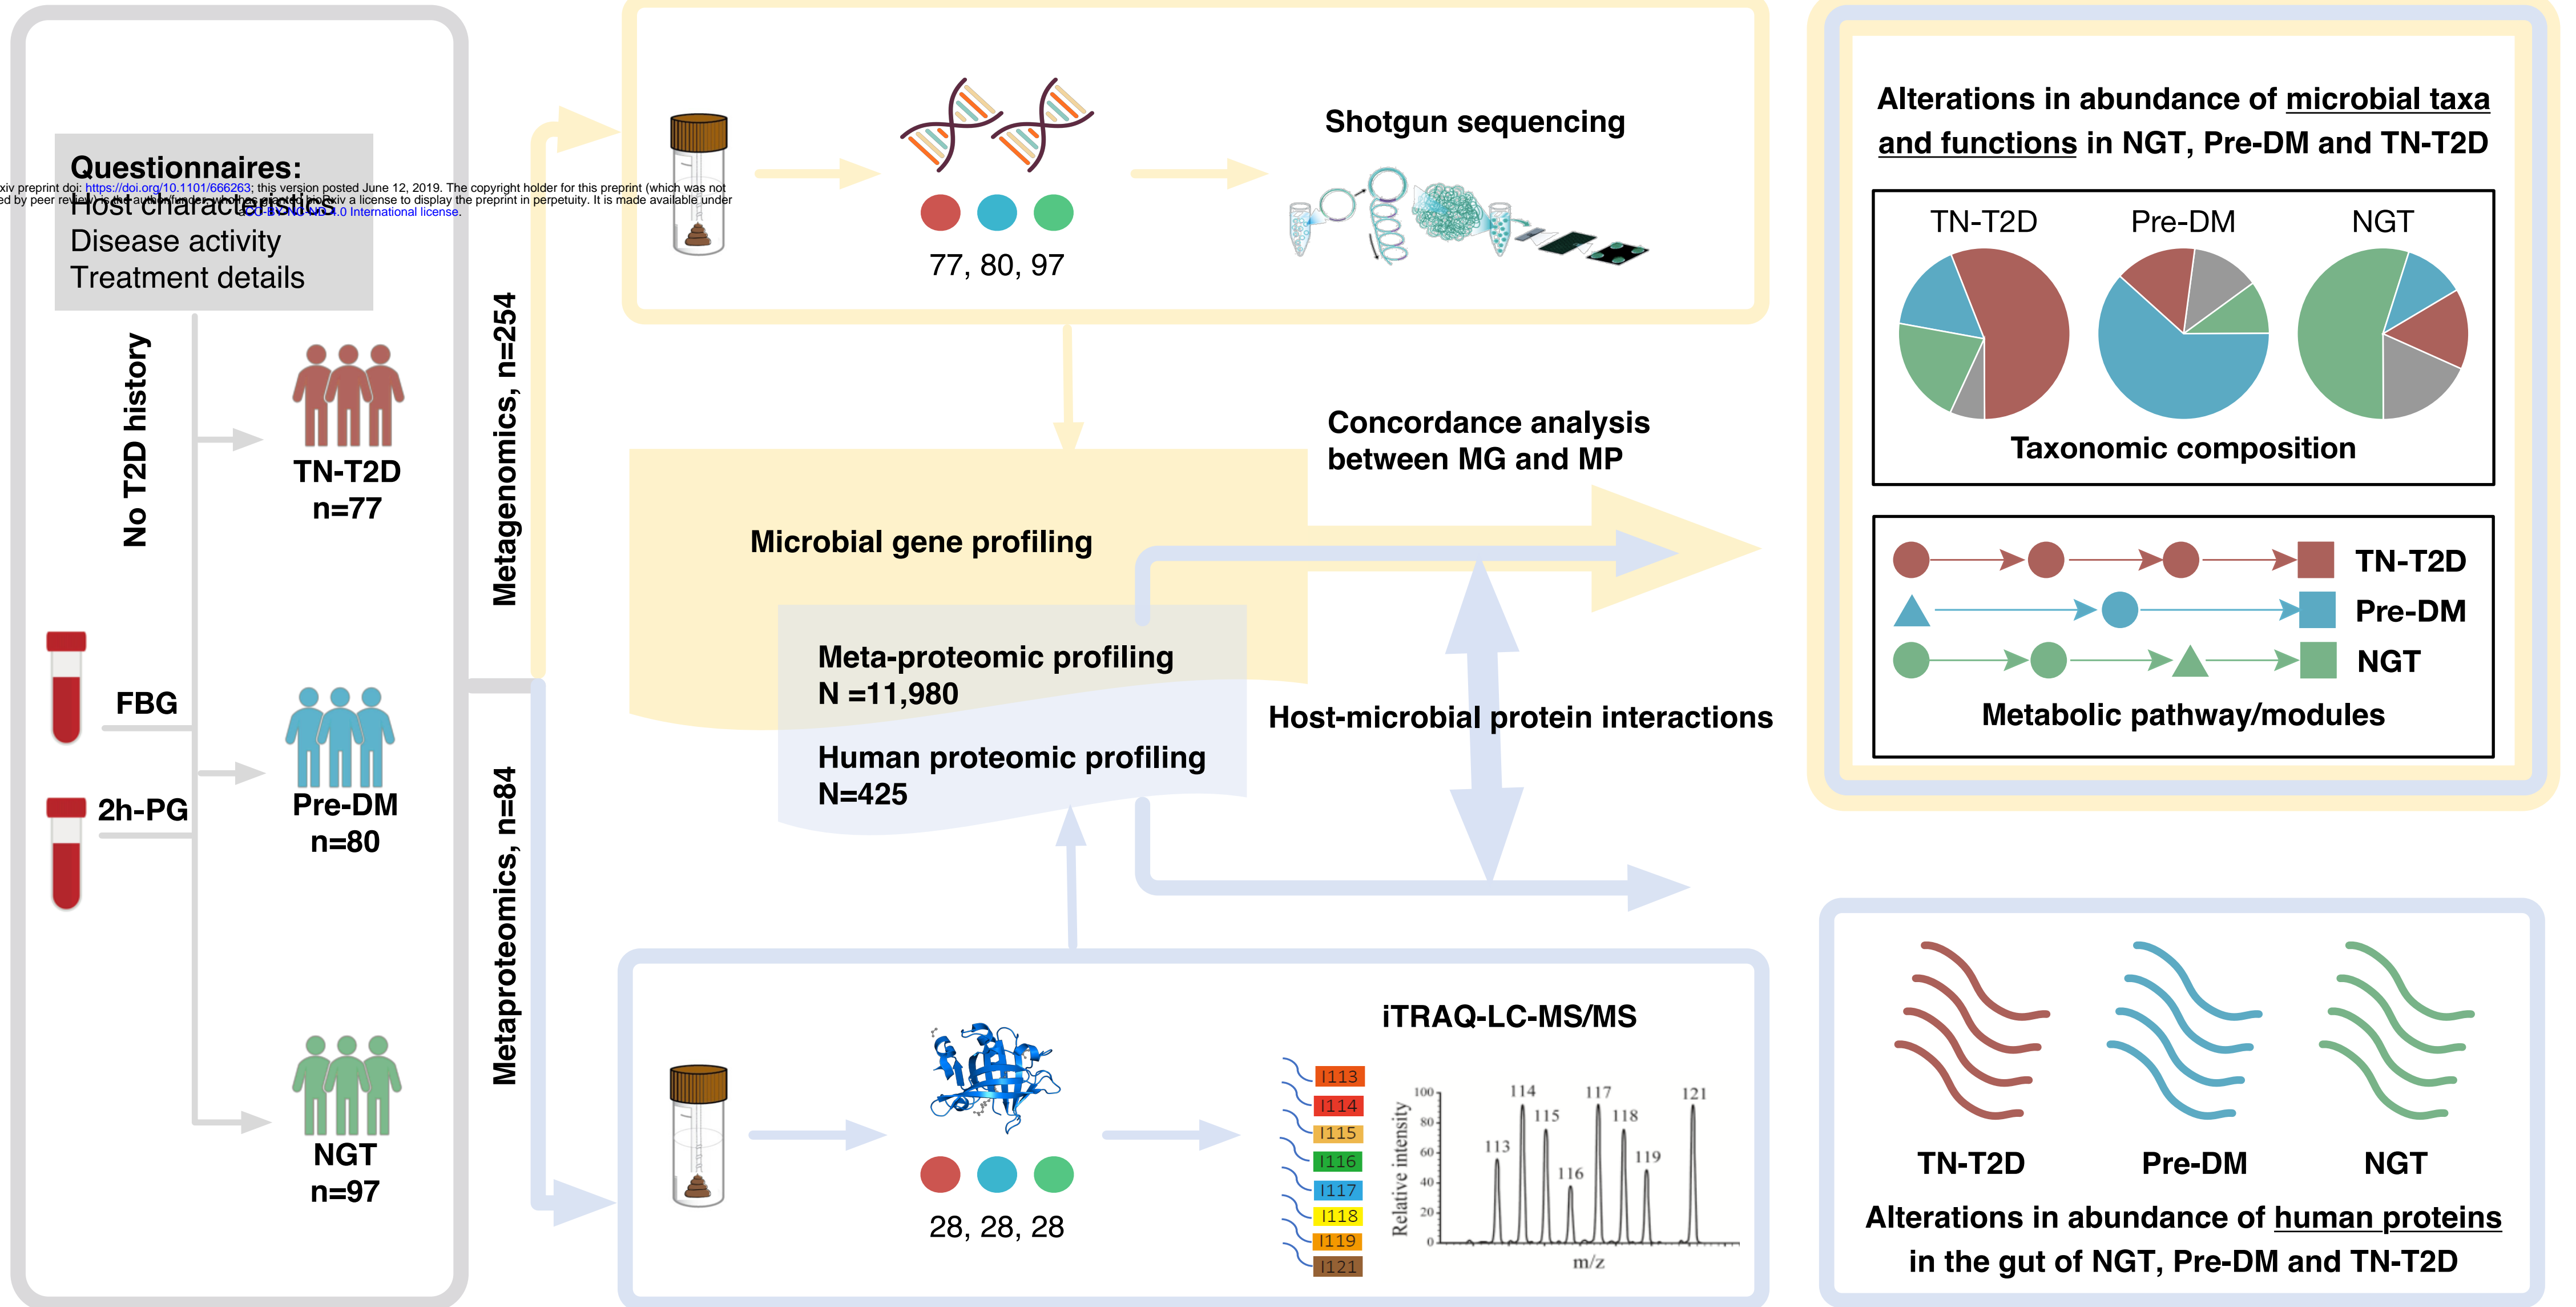

**A**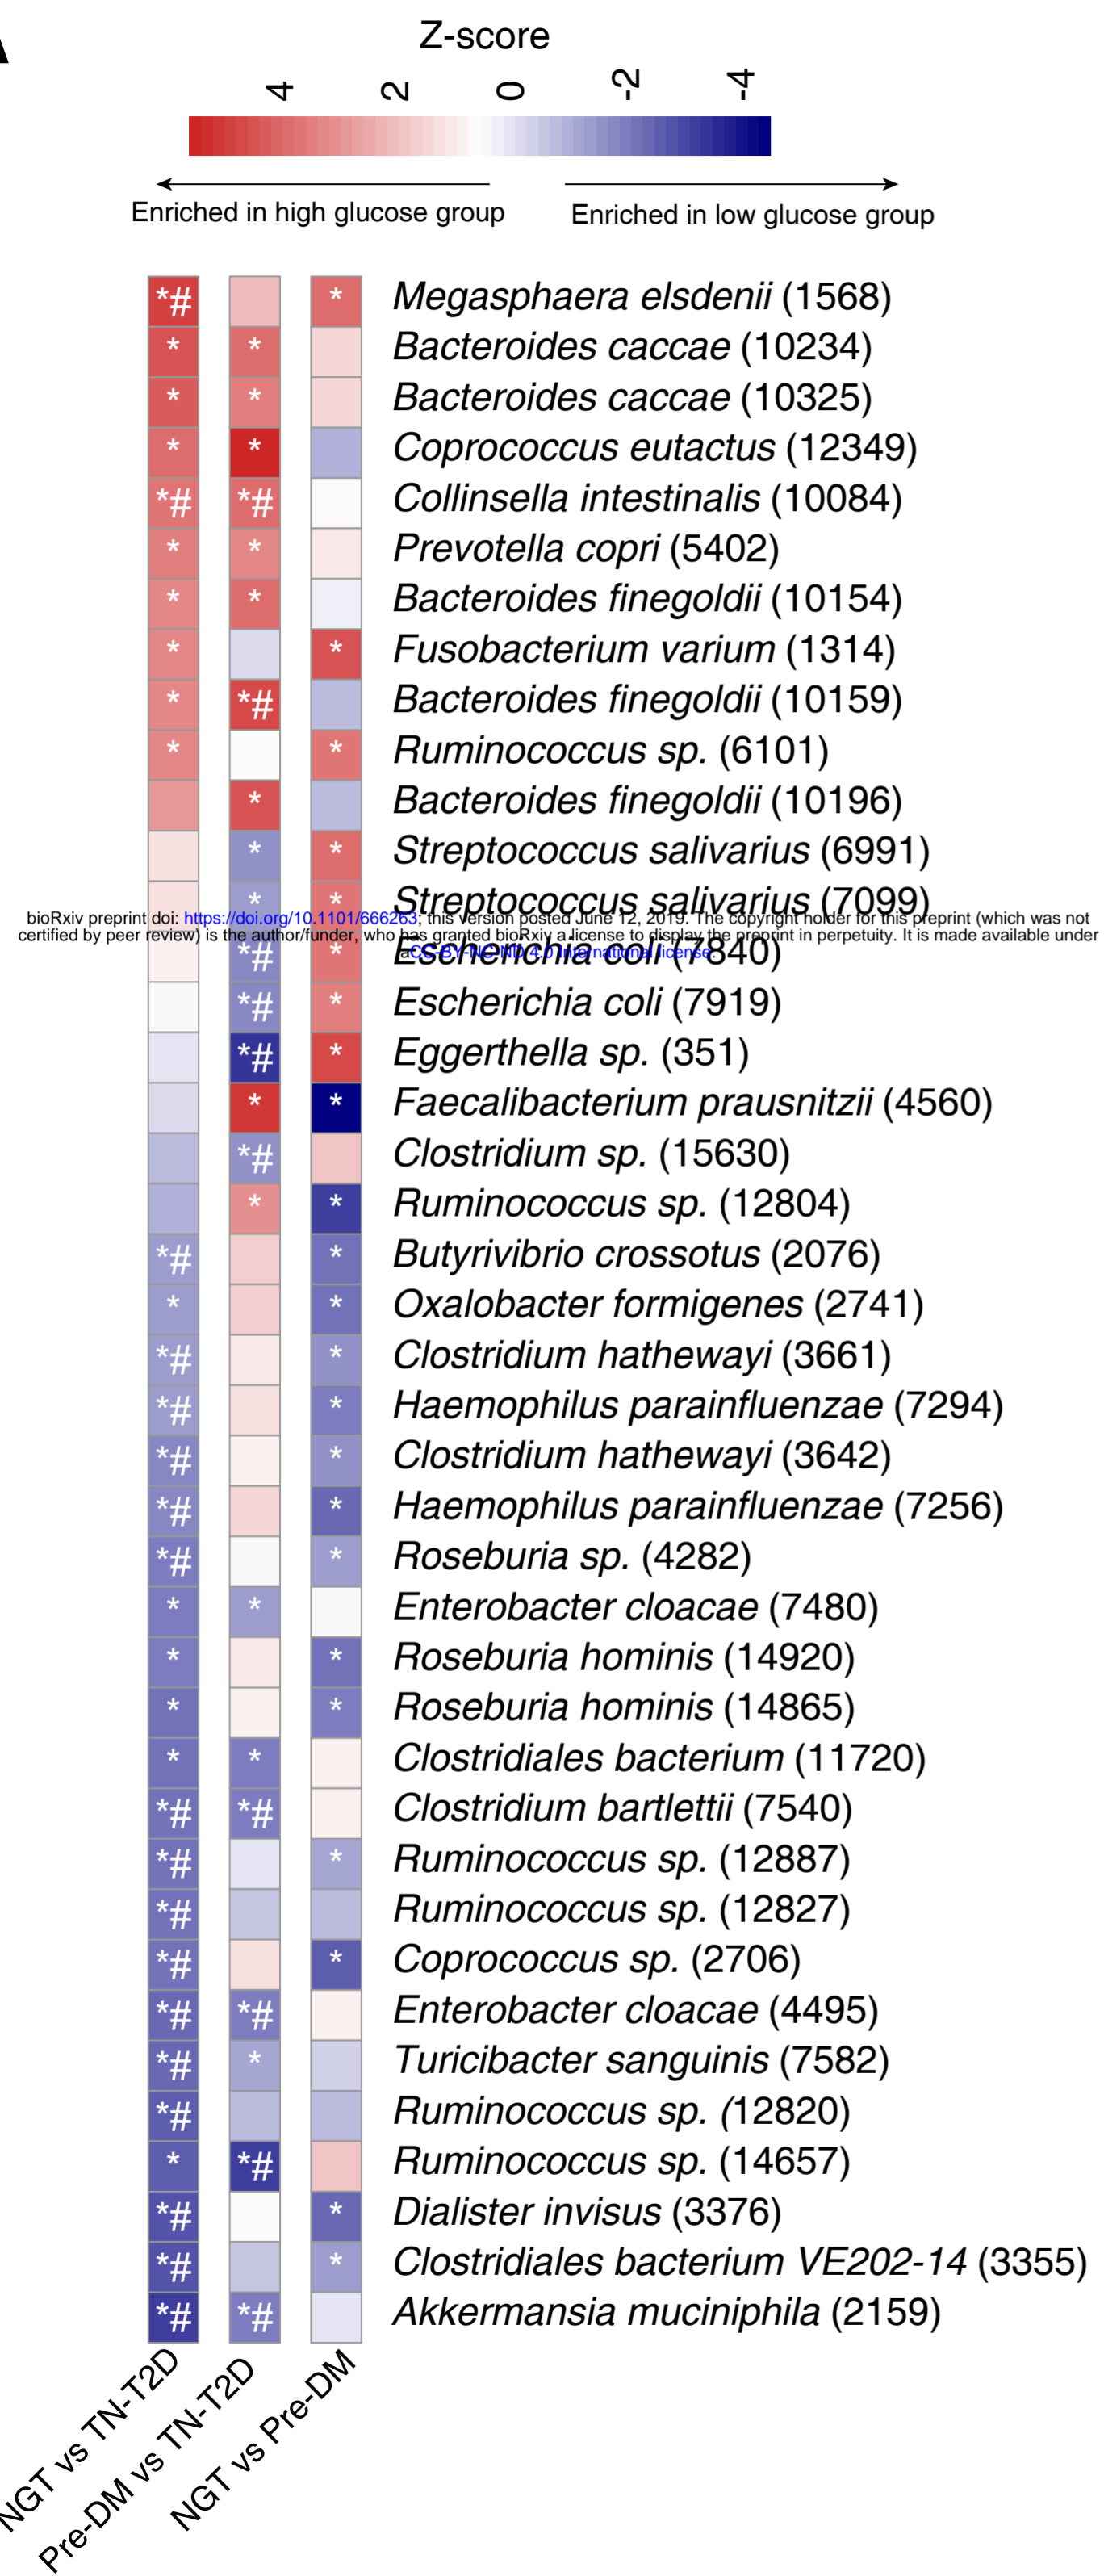**B**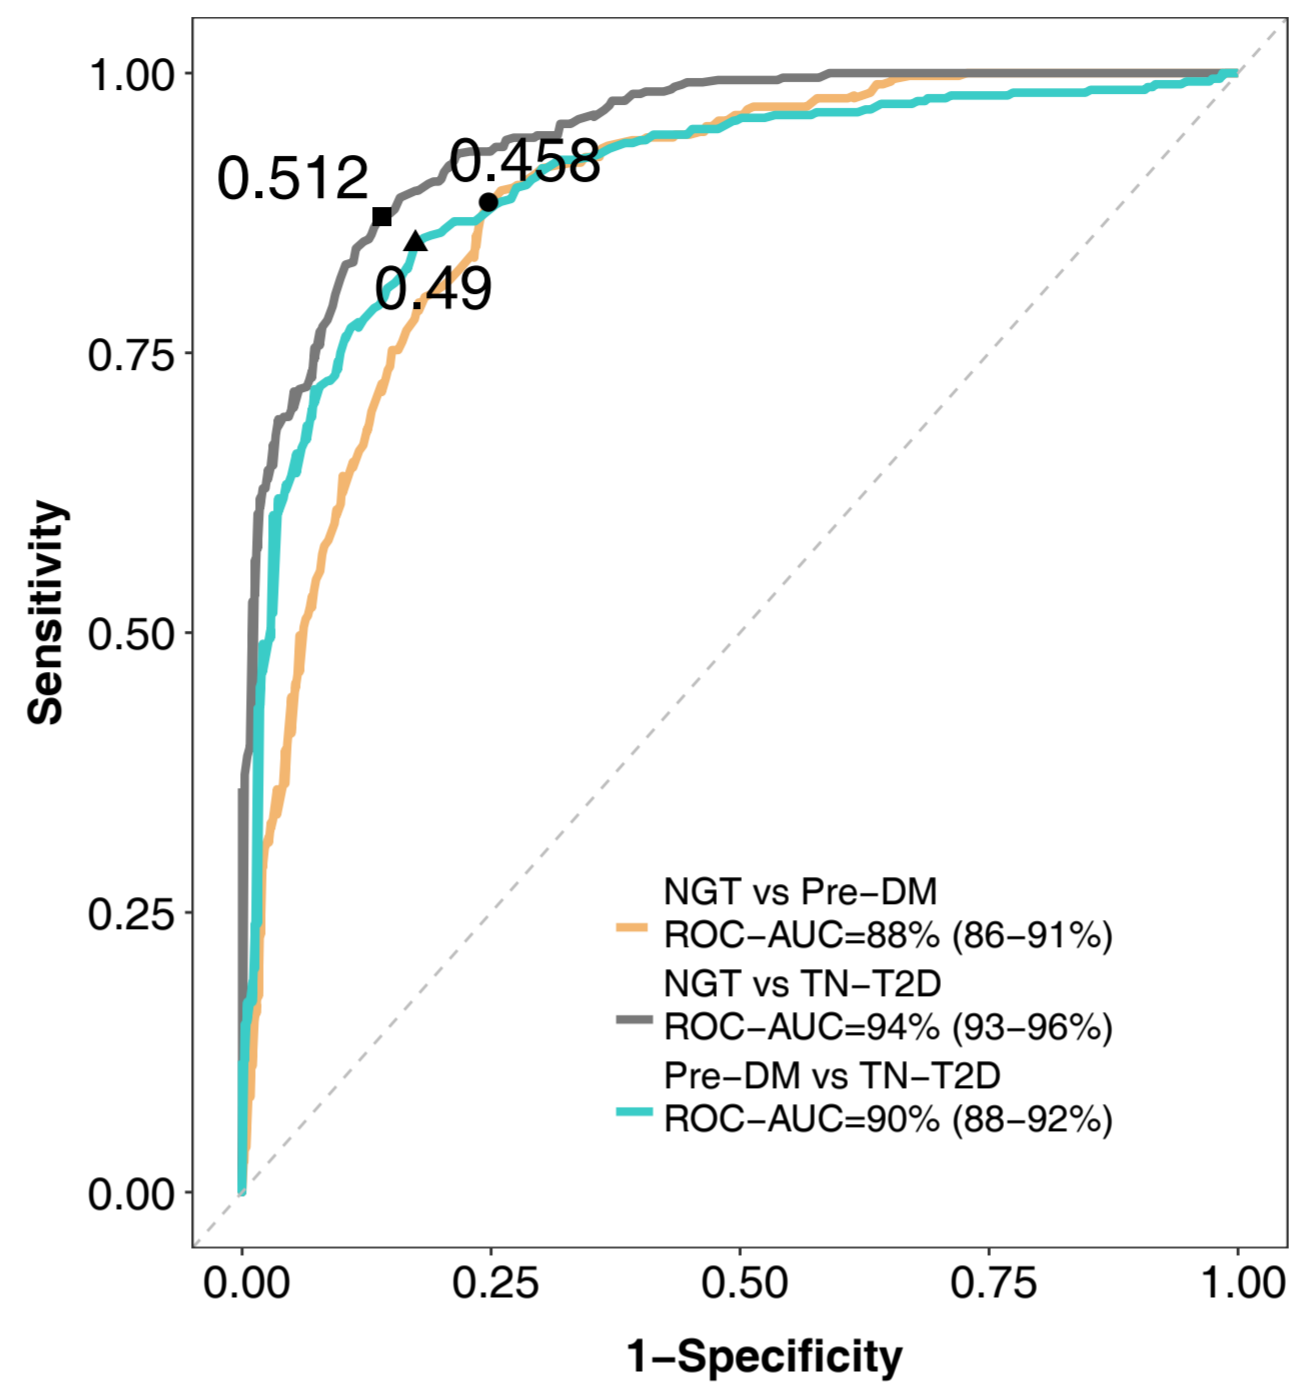**C**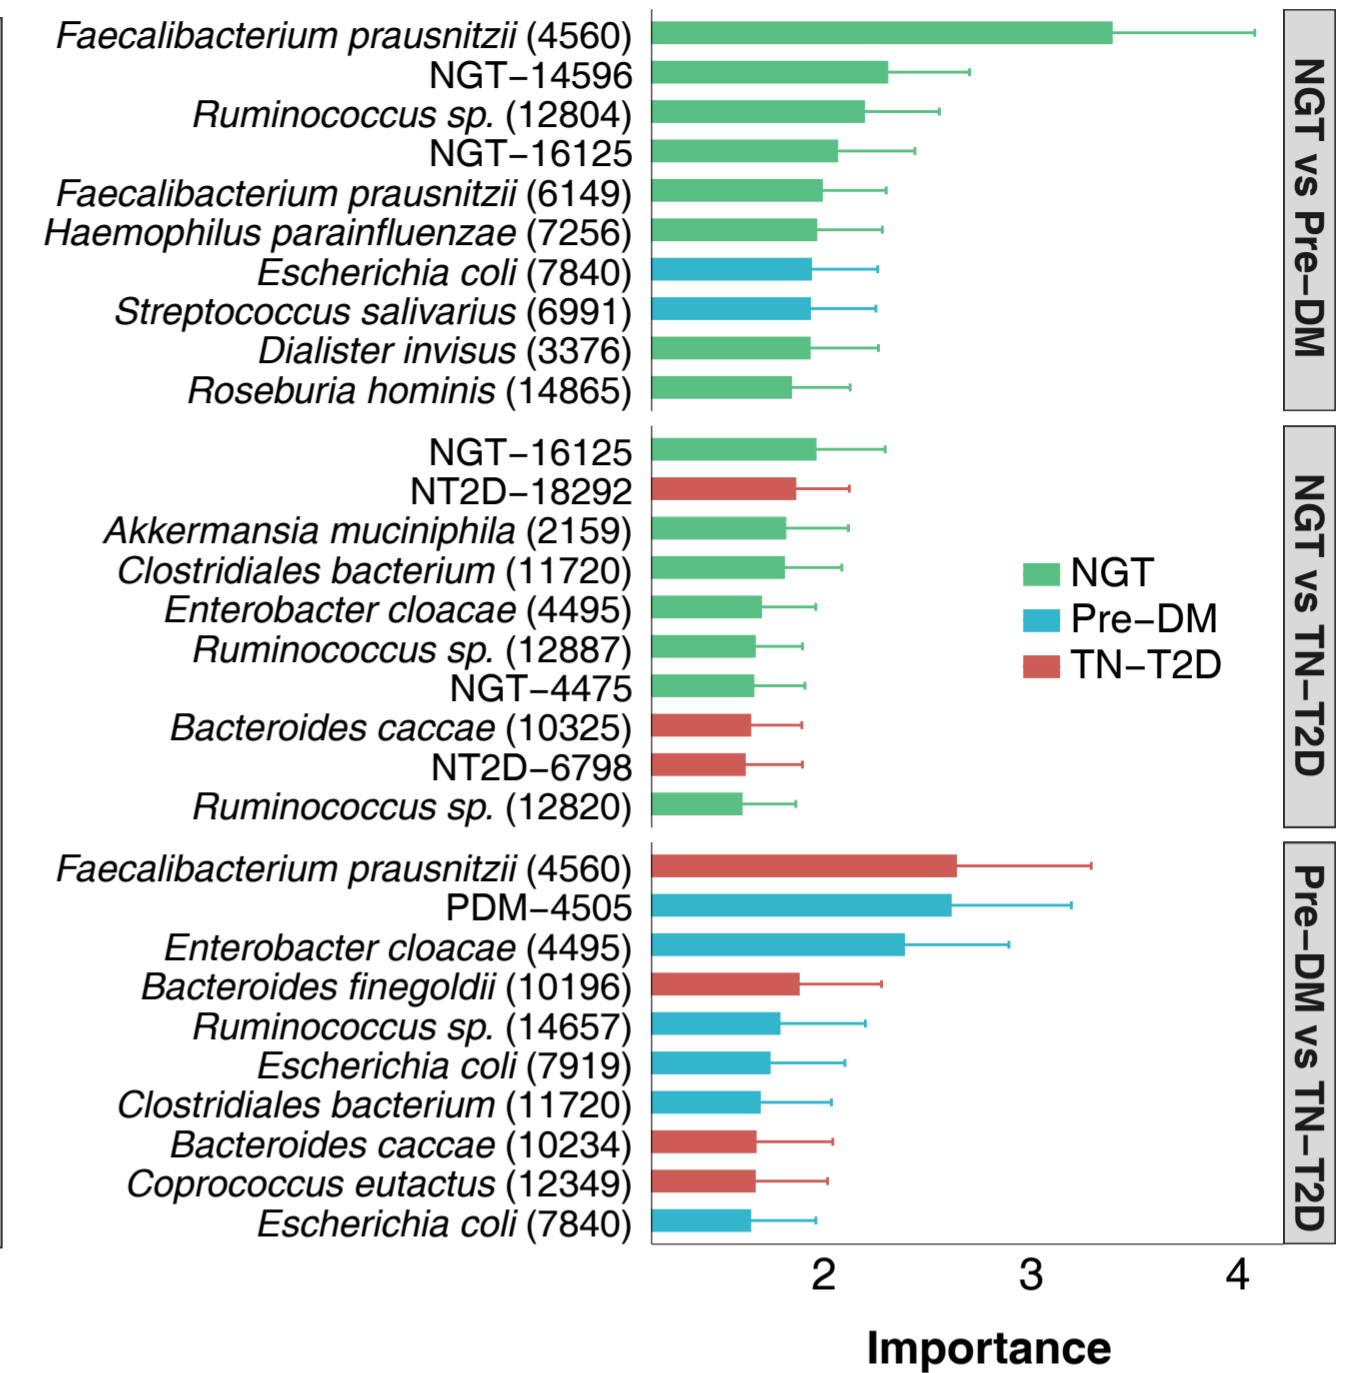**D**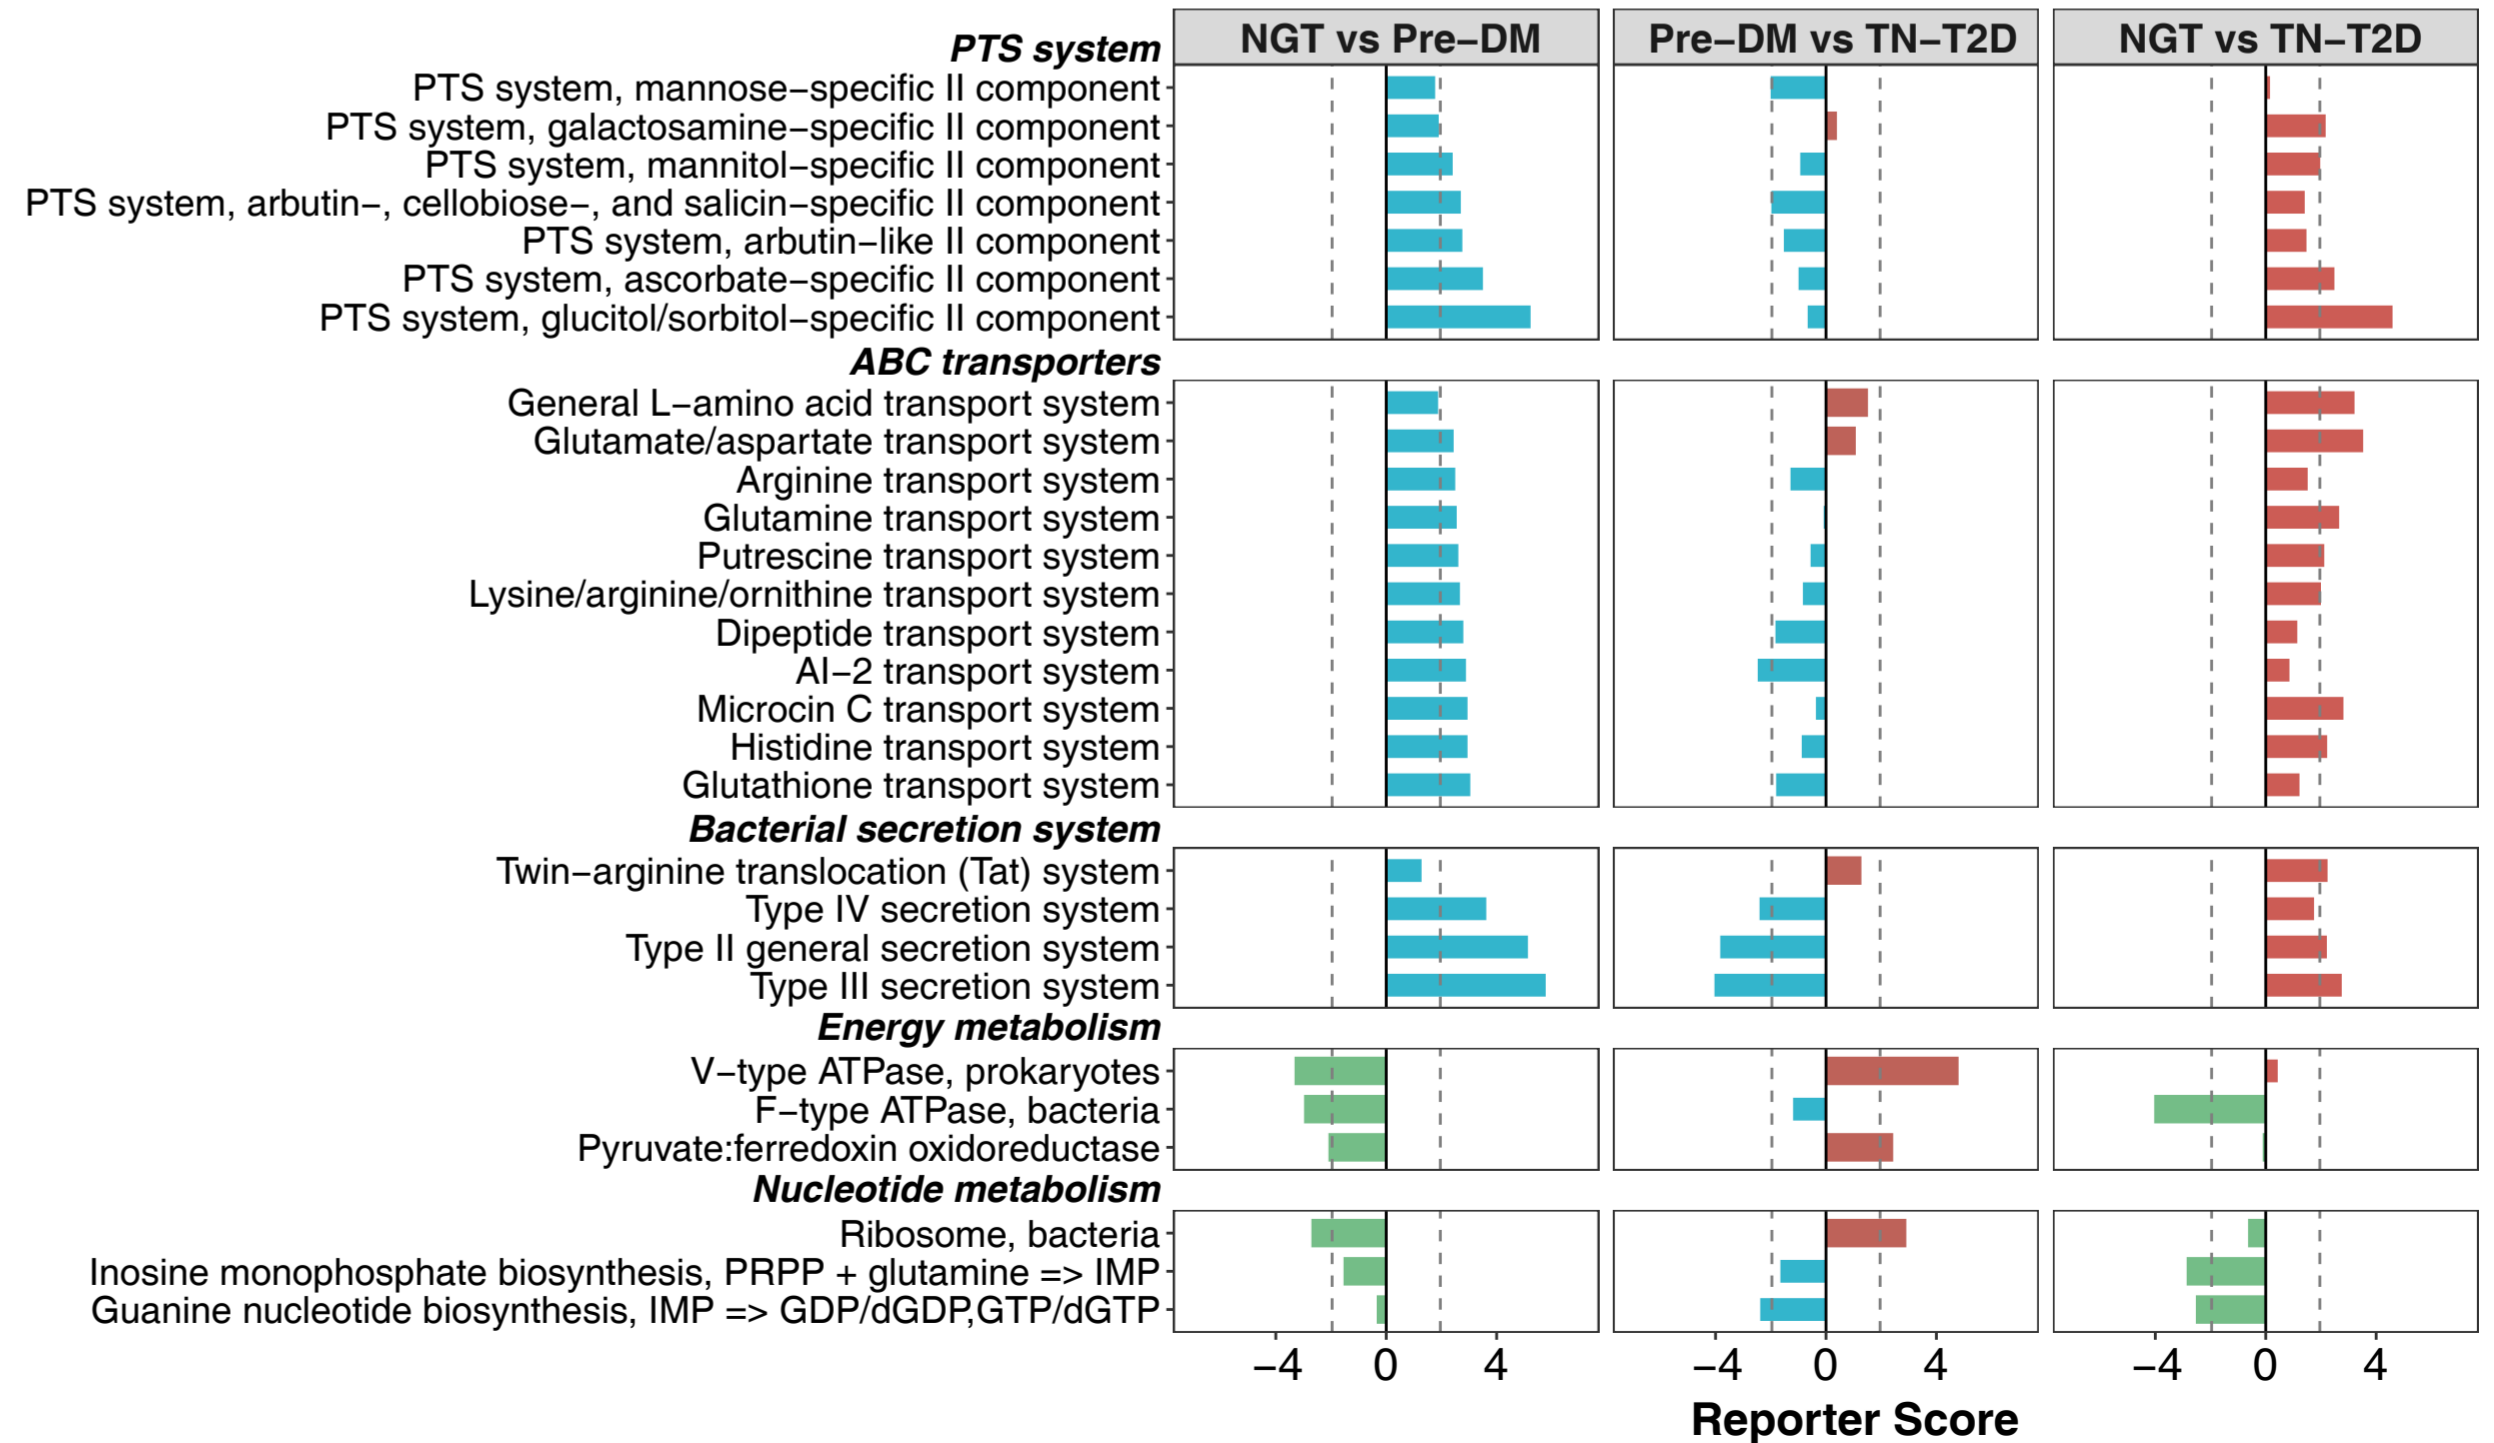

**A**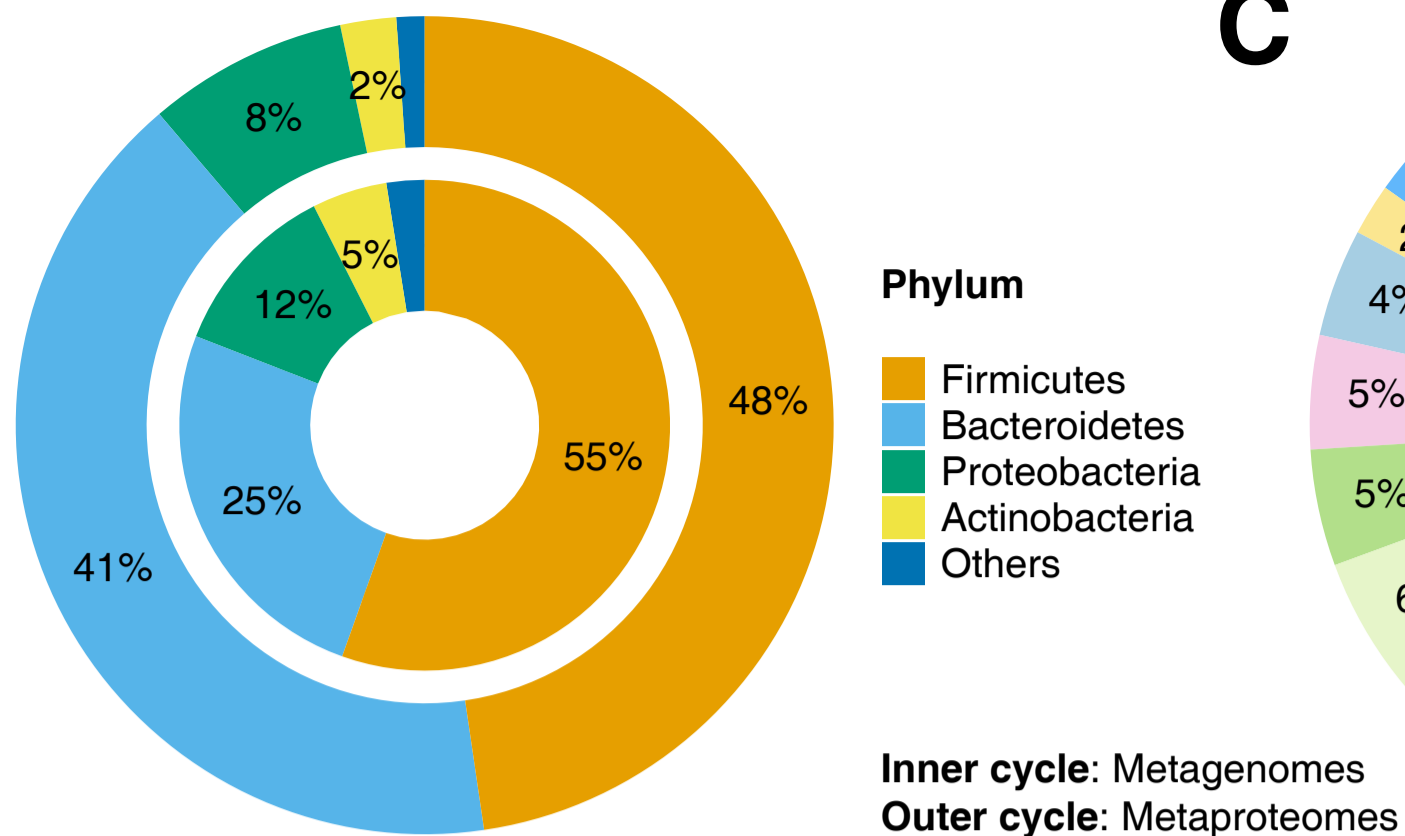**C**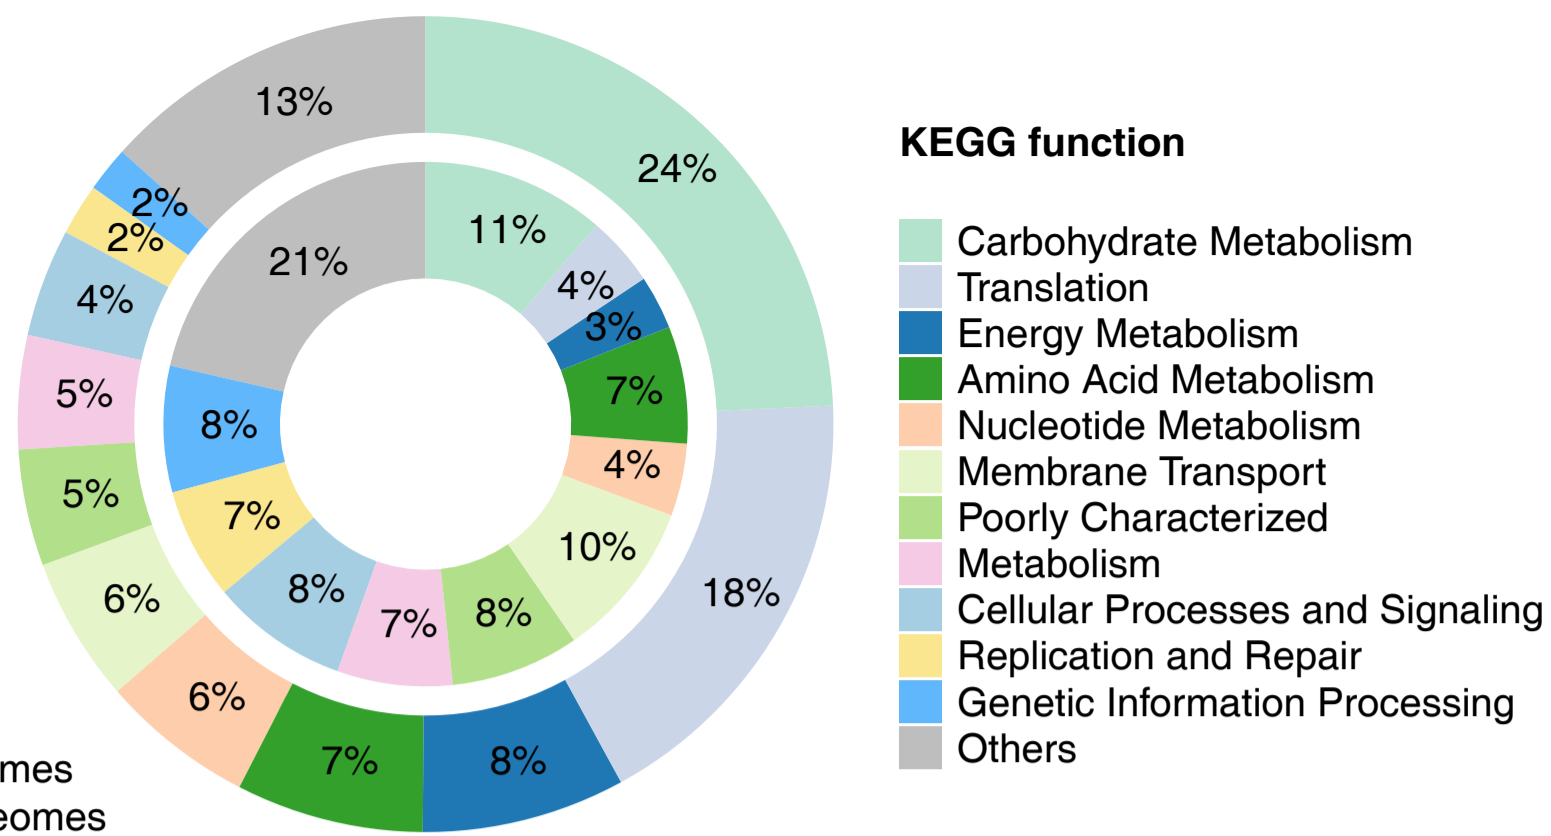**B**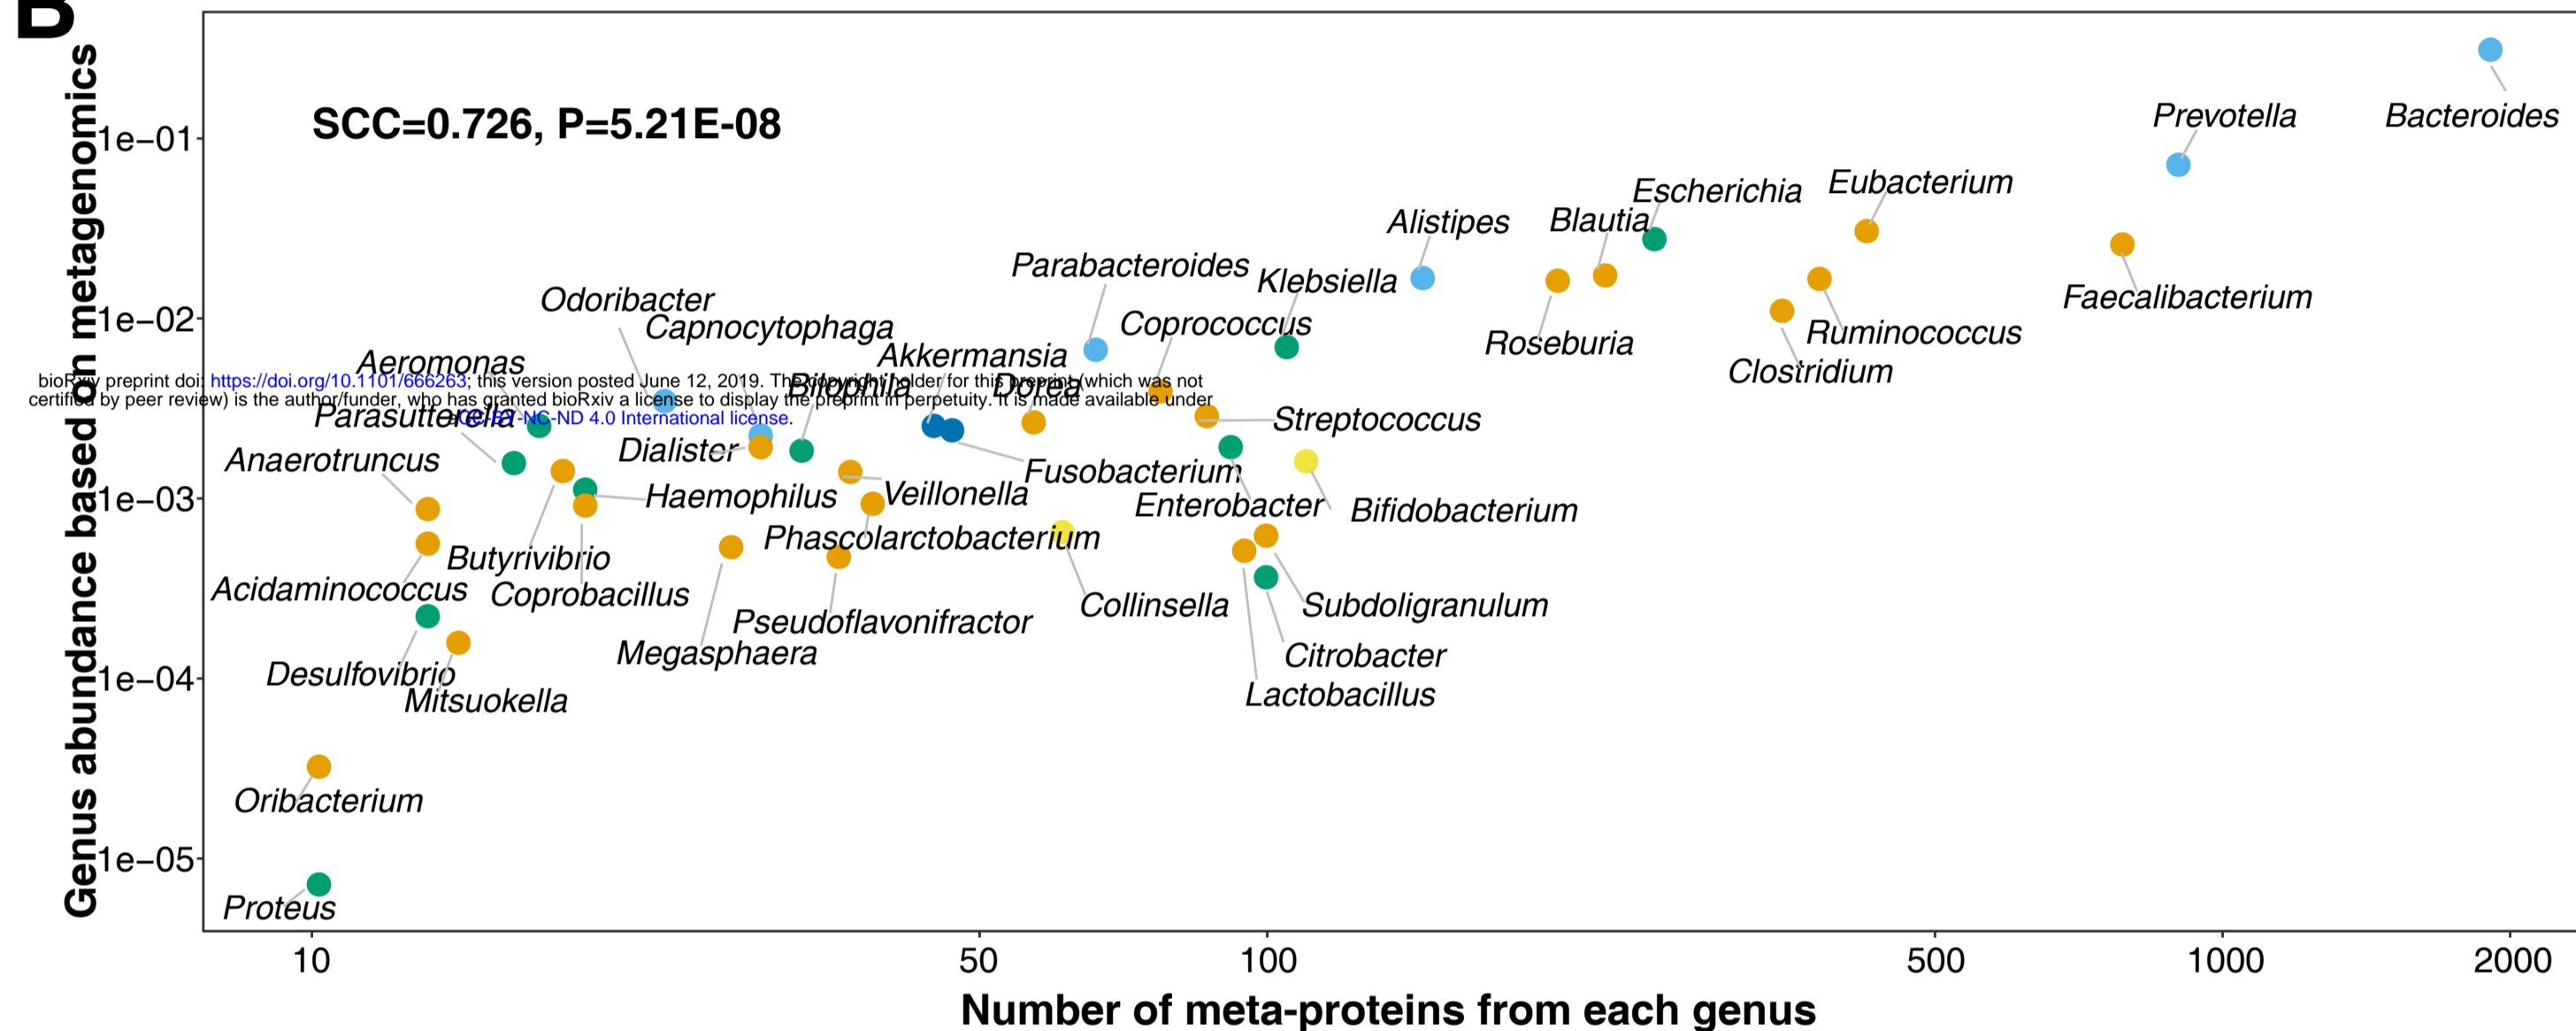**D**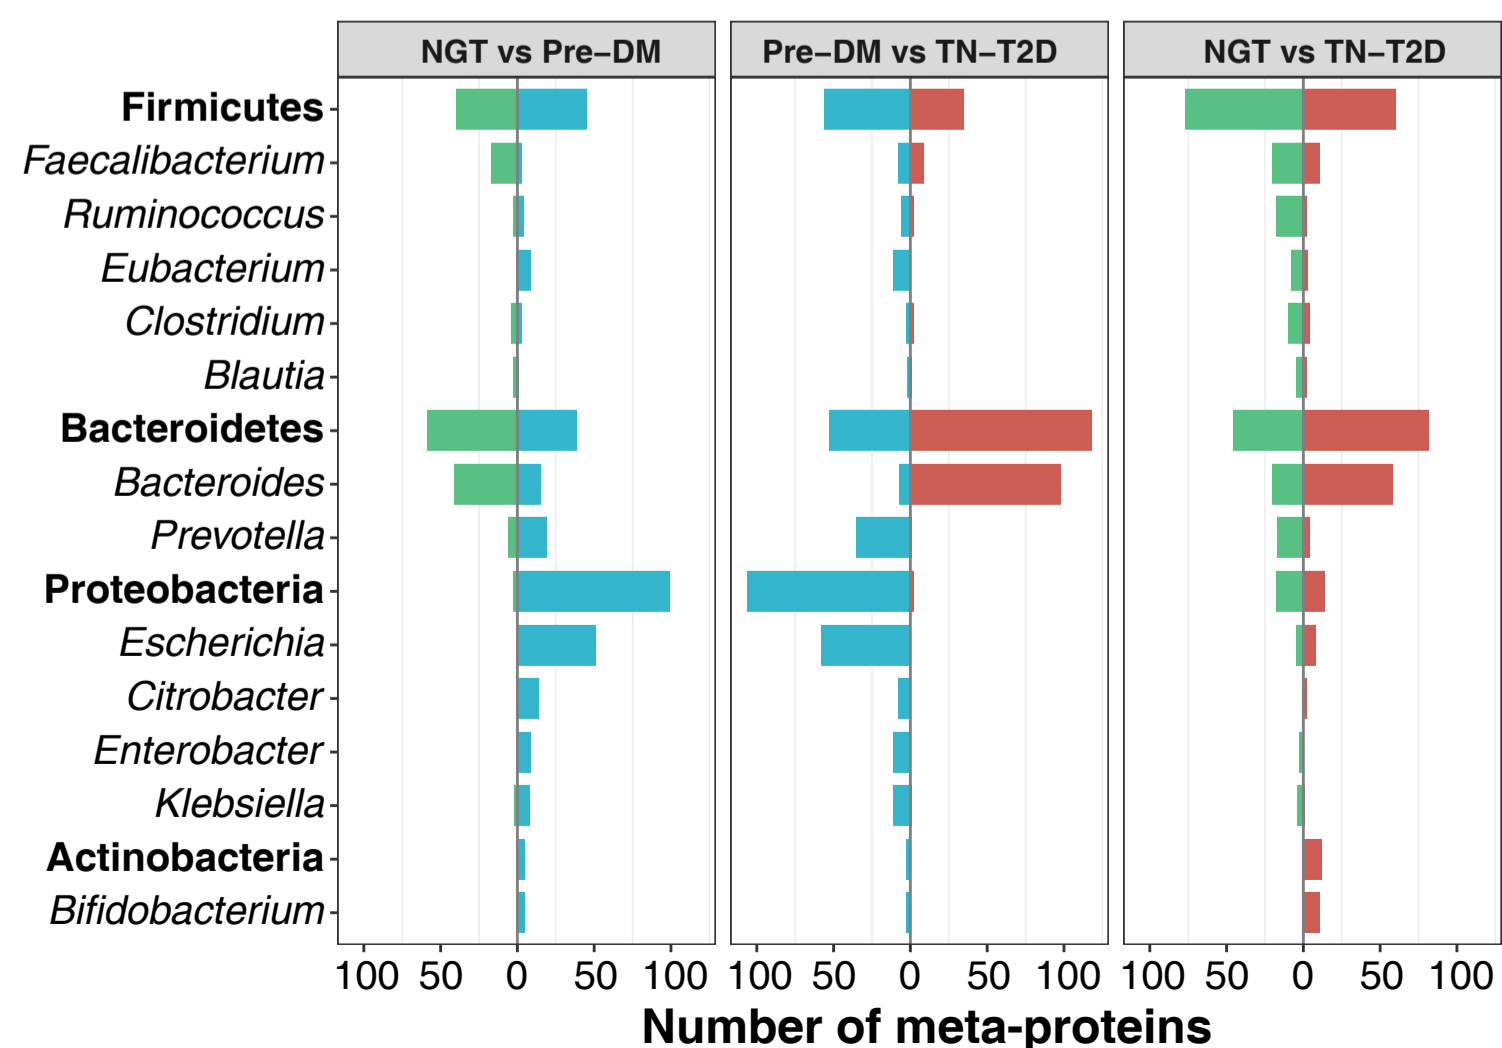**E**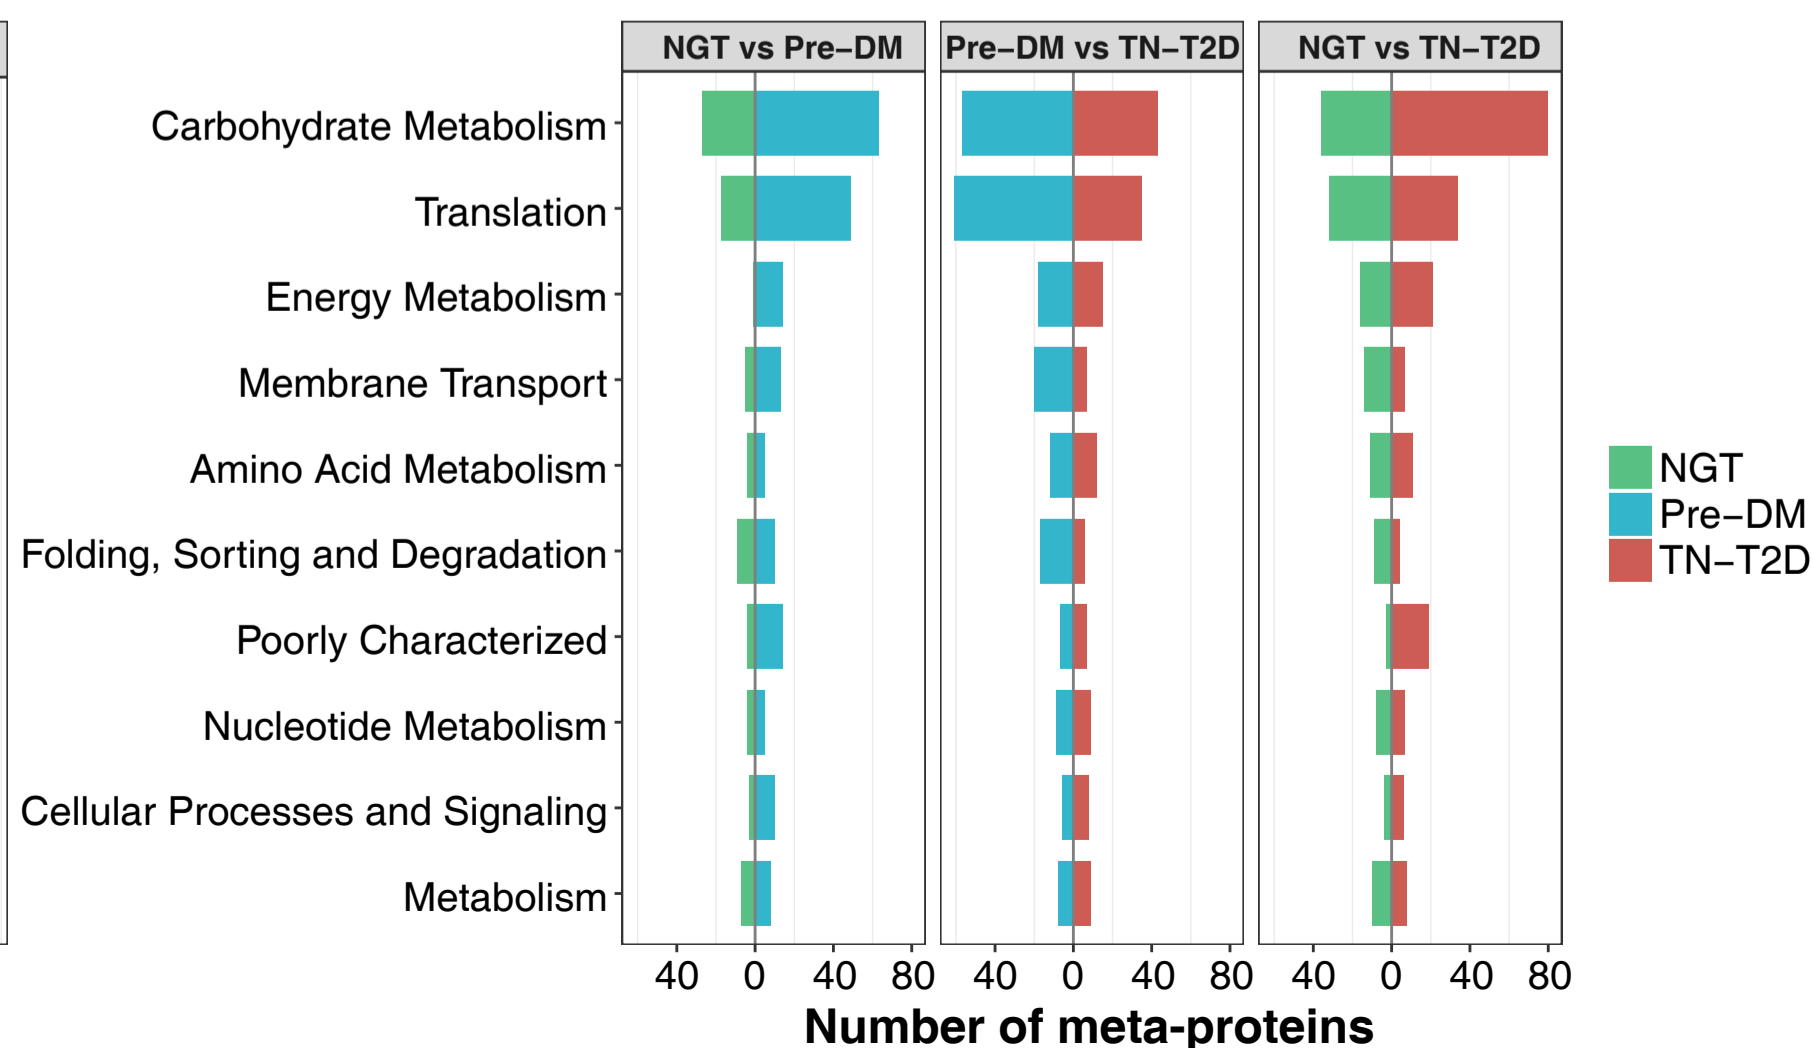

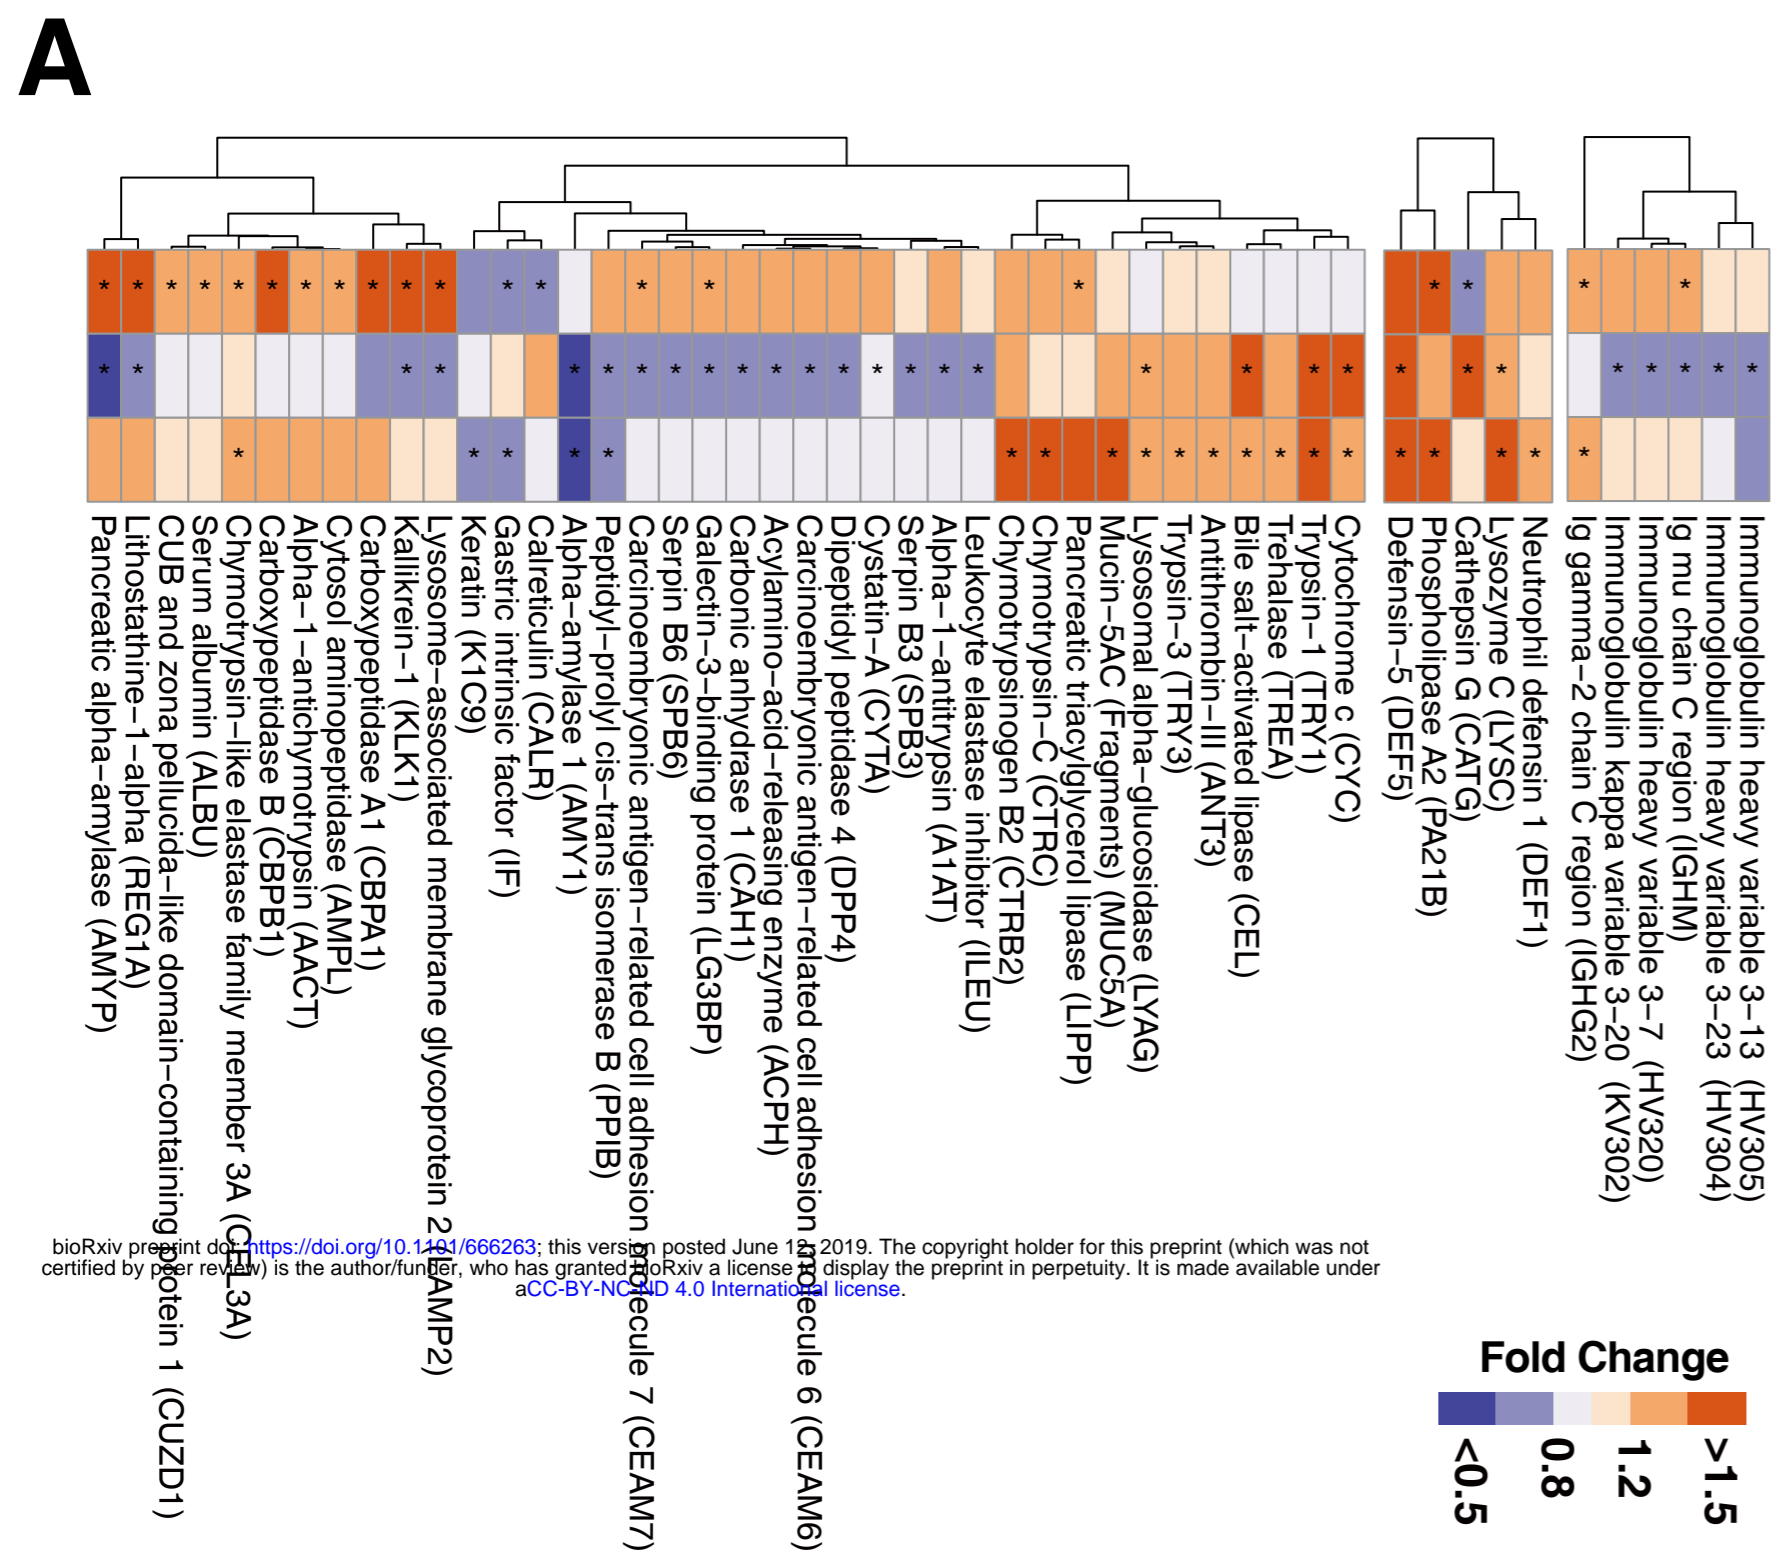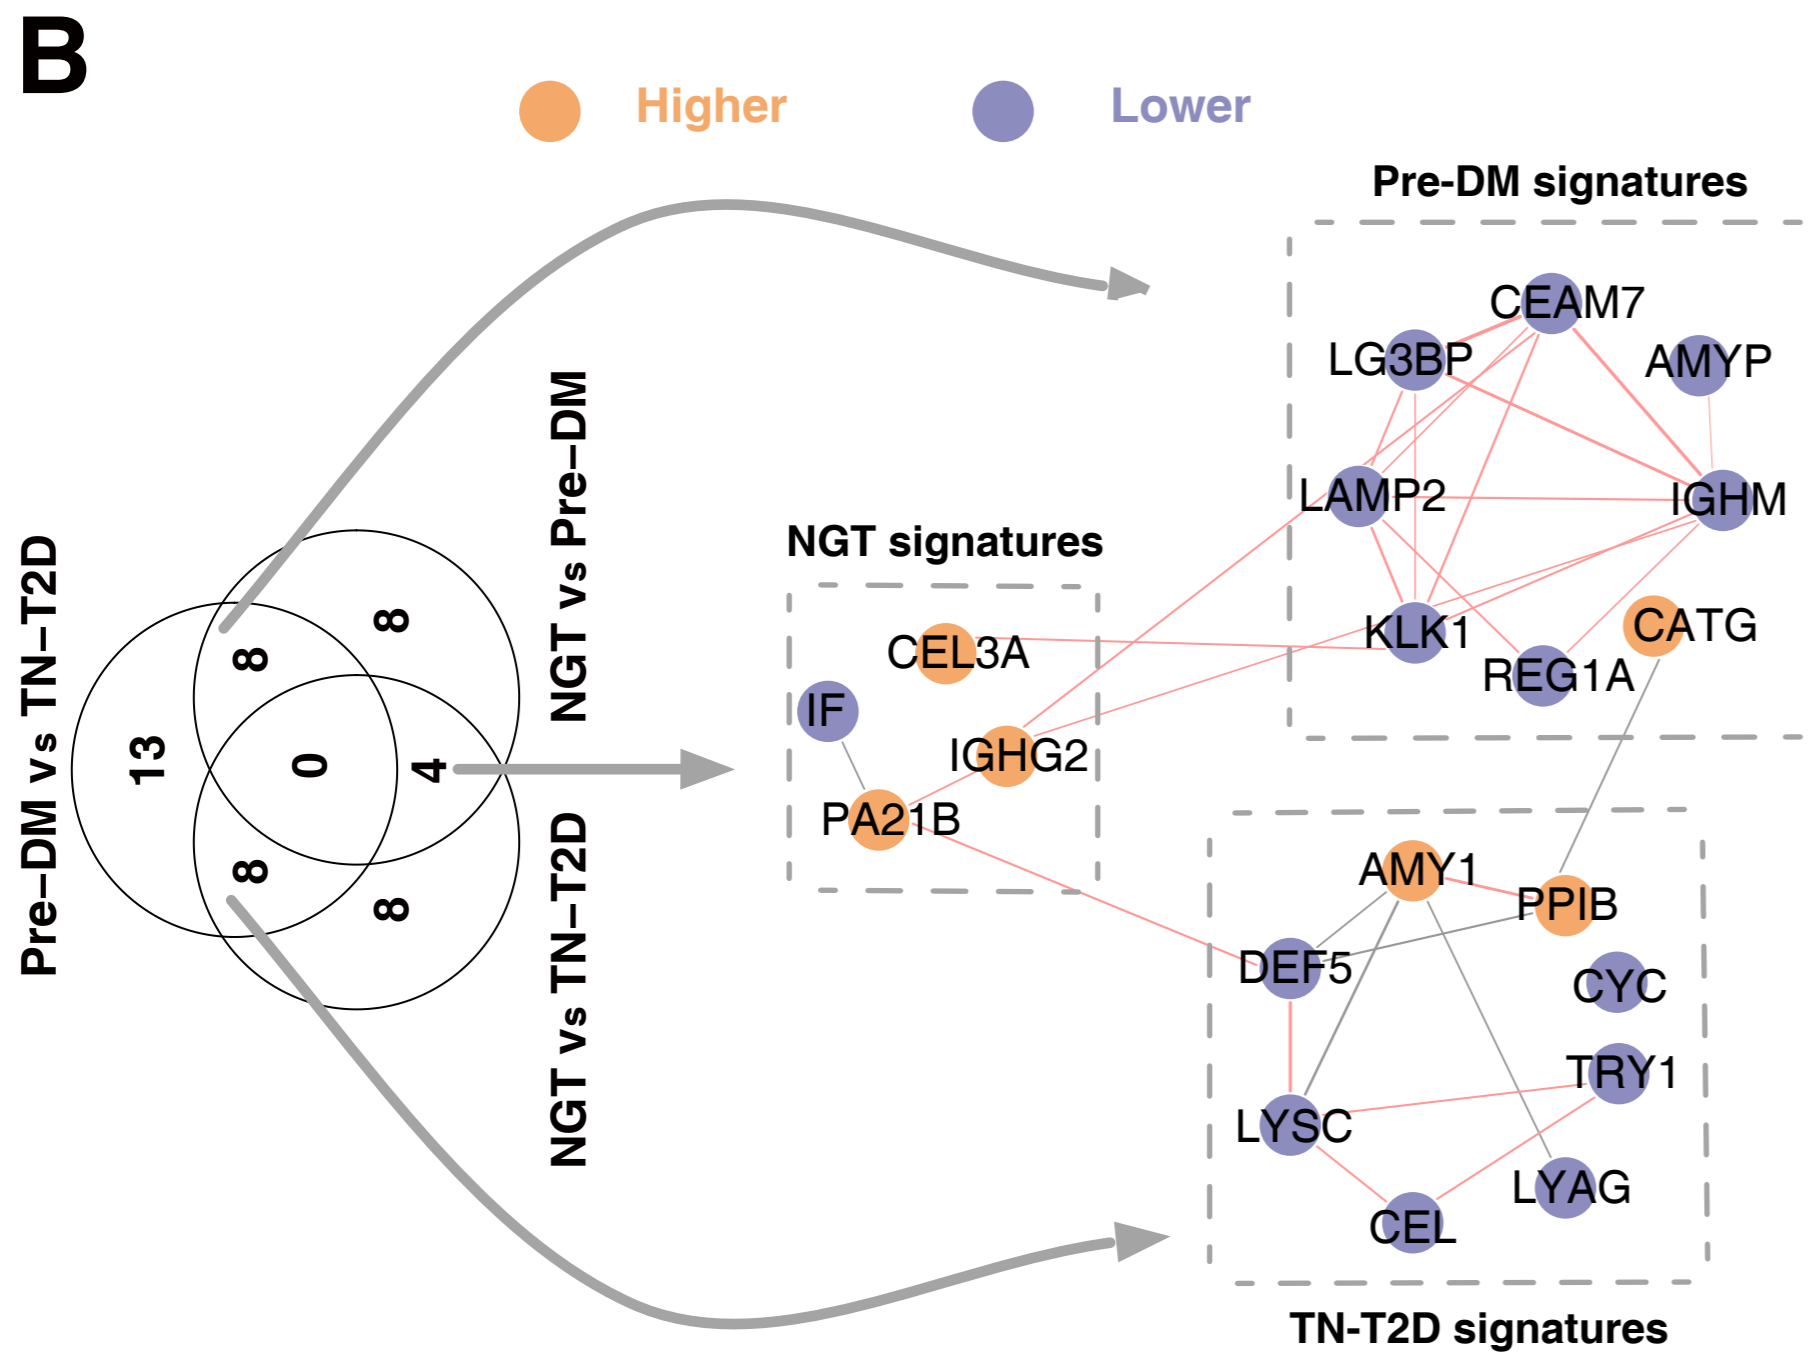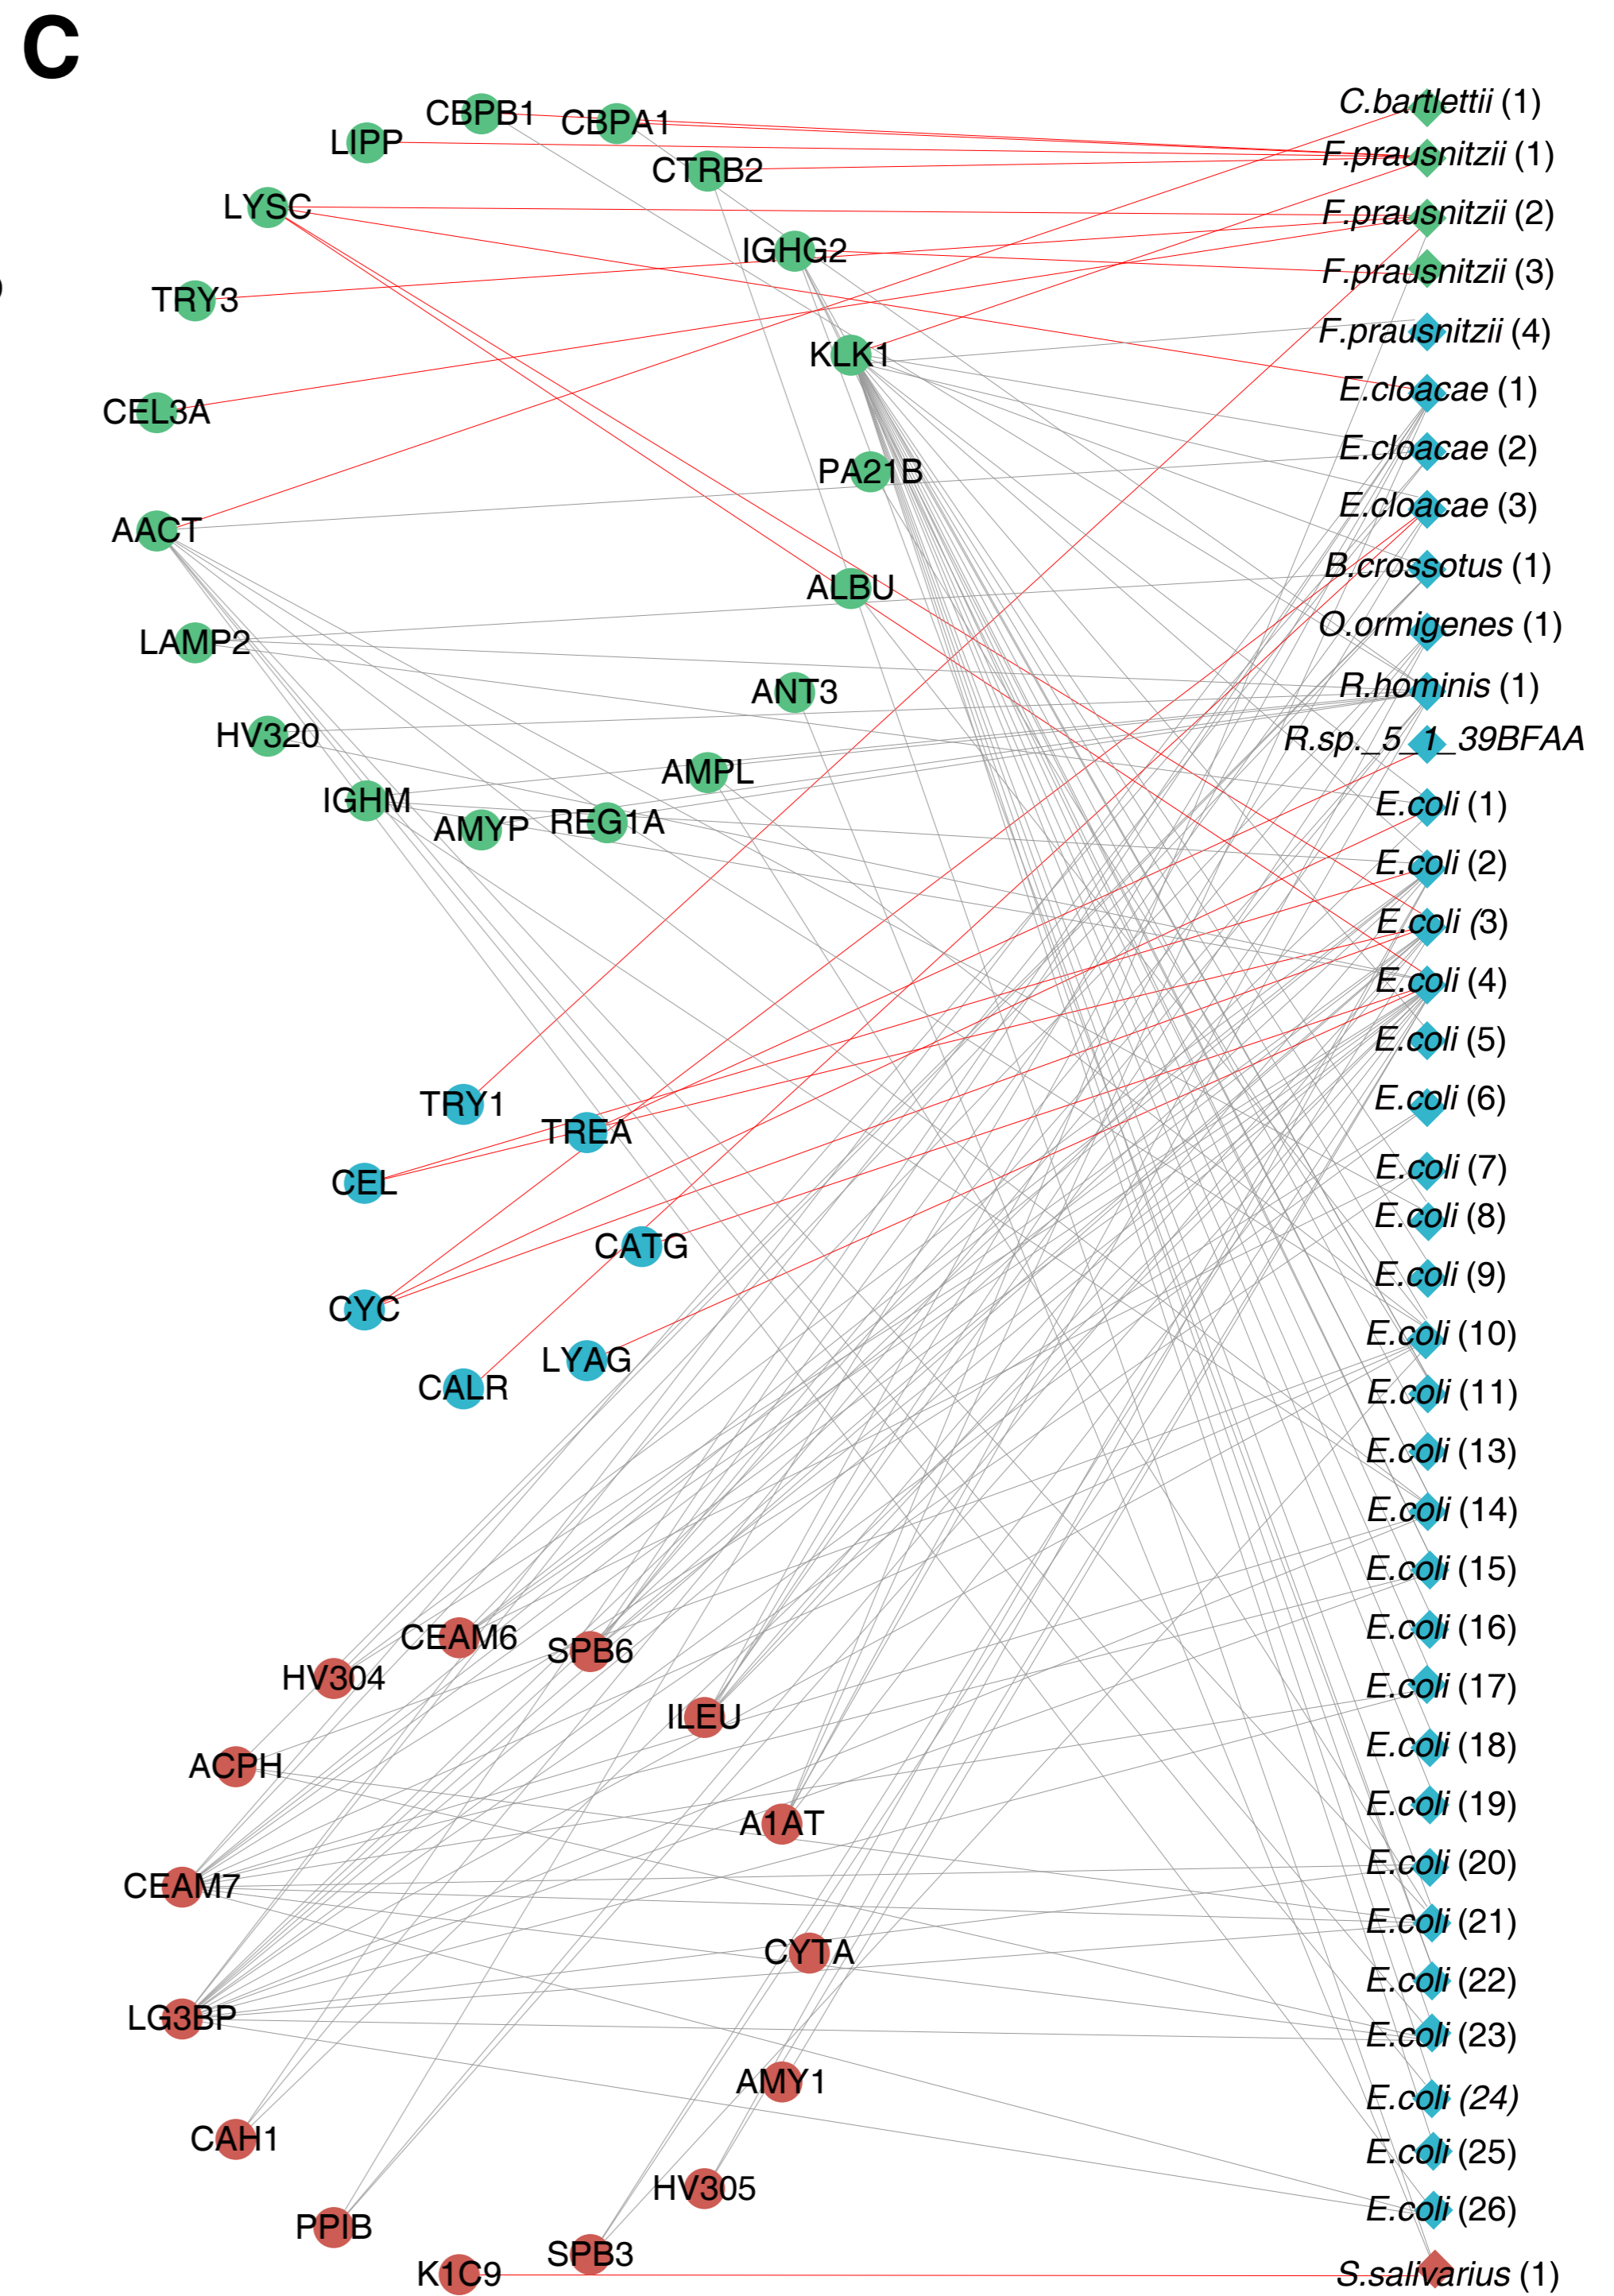

bioRxiv preprint doi: <https://doi.org/10.1101/666263>; this version posted June 18, 2019. The copyright holder for this preprint (which was not certified by peer review) is the author/funder, who has granted bioRxiv a license to display the preprint in perpetuity. It is made available under aCC-BY-NC-ND 4.0 International license.
